1 **A potently neutralizing anti-SARS-CoV-2 antibody inhibits variants of**  
2 **concern by binding a highly conserved epitope**

3  
4 Laura A. VanBlargan<sup>1\*</sup>, Lucas J. Adams<sup>2\*</sup>, Zhuoming Liu<sup>3\*</sup>, Rita E. Chen<sup>1,2</sup>, Pavlo Gilchuk<sup>4</sup>,  
5 Saravanan Raju<sup>1,2</sup>, Brittany K. Smith<sup>2</sup>, Haiyan Zhao<sup>2</sup>, James Brett Case<sup>1</sup>, Emma S. Winkler<sup>1,2</sup>,  
6 Bradley M. Whitener<sup>1</sup>, Lindsay Droit<sup>3</sup>, Ishmael D. Aziati<sup>1</sup>, Pei-Yong Shi<sup>5,6,7</sup>, Adrian Creanga<sup>8</sup>,  
7 Amarendra Pegu<sup>8</sup>, Scott A. Handley<sup>2</sup>, David Wang<sup>3</sup>, Adrianus C.M. Boon<sup>1,2,3</sup>, James E. Crowe,  
8 Jr.<sup>4</sup>, Sean P.J. Whelan<sup>3</sup>, Daved H. Fremont<sup>2,3,9,10</sup>, and Michael S. Diamond<sup>1,2,3,10</sup>§

9  
10 <sup>1</sup>Department of Medicine, Washington University School of Medicine, St. Louis, MO 63110, USA

11 <sup>2</sup>Department of Pathology & Immunology, Washington University School of Medicine, St. Louis, MO  
12 63110, USA.

13 <sup>3</sup>Department of Molecular Microbiology, Washington University School of Medicine, St. Louis, MO  
14 63110, USA.

15 <sup>4</sup>Vanderbilt Vaccine Center, Vanderbilt University Medical Center, Nashville, TN 37232, USA.

16 <sup>5</sup>Department of Biochemistry and Molecular Biology, University of Texas Medical Branch, Galveston TX

17 <sup>6</sup>Departments of Microbiology and Immunology, University of Texas Medical Branch, Galveston TX

18 <sup>7</sup>Sealy Institute for Vaccine Sciences, University of Texas Medical Branch, Galveston, TX

19 <sup>8</sup>Vaccine Research Center, National Institute of Allergy and Infectious Diseases, National Institutes of  
20 Health, Bethesda, MD, USA.

21 <sup>9</sup>Department of Biochemistry and Molecular Biophysics, Washington University School of Medicine, St.  
22 Louis, MO 63110, USA.

23 <sup>10</sup>Andrew M. and Jane M. Bursky Center for Human Immunology and Immunotherapy Programs,  
24 Washington University School of Medicine, St. Louis, MO.

25

26 \*These authors contributed equally; § Lead Contact

27 Address correspondence to: Daved H. Fremont, [Fremont@wustl.edu](mailto:Fremont@wustl.edu); Michael S. Diamond, M.D.

28 Ph.D., [diamond@wusm.wustl.edu](mailto:diamond@wusm.wustl.edu)

29 **SUMMARY**

30           With the emergence of SARS-CoV-2 variants with increased transmissibility and  
31 potential resistance, antibodies and vaccines with broadly inhibitory activity are needed. Here we  
32 developed a panel of neutralizing anti-SARS-CoV-2 mAbs that bind the receptor binding domain  
33 of the spike protein at distinct epitopes and block virus attachment to cells and its receptor,  
34 human angiotensin converting enzyme-2 (hACE2). While several potently neutralizing mAbs  
35 protected K18-hACE2 transgenic mice against infection caused by historical SARS-CoV-2  
36 strains, others induced escape variants *in vivo* and lost activity against emerging strains. We  
37 identified one mAb, SARS2-38, that potently neutralizes all SARS-CoV-2 variants of concern  
38 tested and protects mice against challenge by multiple SARS-CoV-2 strains. Structural analysis  
39 showed that SARS2-38 engages a conserved epitope proximal to the receptor binding motif.  
40 Thus, treatment with or induction of inhibitory antibodies that bind conserved spike epitopes  
41 may limit the loss of potency of therapies or vaccines against emerging SARS-CoV-2 variants.

## 42 INTRODUCTION

43 Severe acute respiratory syndrome-related coronavirus (SARS-CoV) and SARS-CoV-2  
44 belong to the Sarbecovirus subgenus of Betacoronaviruses (Viruses, 2020). In little more than a  
45 year, the coronavirus disease 2019 (COVID-19) pandemic caused by the rapid emergence of  
46 SARS-CoV-2 has resulted in over 140 million infections and 3 million deaths worldwide  
47 (<https://covid19.who.int/>). Multiple effective vaccines against SARS-CoV-2 that prevent  
48 COVID-19 have been rapidly developed and deployed (Baden et al., 2021; Polack et al., 2020;  
49 Sadoff et al., 2021; Voysey et al., 2021). Monoclonal antibodies (mAb) also have shown efficacy  
50 in animal models of SARS-CoV-2 infection (Alsoussi et al., 2020; Baum et al., 2020a; Fagre et  
51 al., 2020; Hansen et al., 2020; Hassan et al., 2020; Kreye et al., 2020; Rogers et al., 2020; Shi et  
52 al., 2020; Zost et al., 2020), and two mAb treatments are approved for use in patients under  
53 Emergency Use Authorization (EUA) (Chen et al., 2021b; Weinreich et al., 2021). Therapy with  
54 mAbs may be beneficial to high-risk patients following exposure to SARS-CoV-2 with mild or  
55 moderate symptoms, but prior to onset of severe disease signs and symptoms, and can  
56 complement the usage of vaccines as a means of combating the COVID-19 pandemic.

57 The majority of characterized potently neutralizing and protective anti-SARS-CoV-2  
58 mAbs bind the receptor binding domain (RBD) of the viral spike protein (Barnes et al., 2020;  
59 Baum *et al.*, 2020a; Cao et al., 2020; Tortorici et al., 2020; Zost *et al.*, 2020), though some  
60 inhibitory mAbs against the N-terminal domain (NTD) of spike also have been described (Chi et  
61 al., 2020; Liu et al., 2020; Suryadevara et al., 2021). Under immune selection pressure, SARS-  
62 CoV-2 can select for mutations in the RBD and NTD that enable escape from antibody  
63 recognition and neutralization (Baum et al., 2020b; Greaney et al., 2021; Liu et al., 2021; Starr et  
64 al., 2021; Suryadevara *et al.*, 2021). Indeed, several emerging SARS-CoV-2 variants have

65 mutations in the spike protein, including the RBD and NTD, that confer resistance to mAbs or  
66 polyclonal antibodies (pAbs) elicited by vaccines or natural infection (Chen et al., 2021d;  
67 Thomson et al., 2021; Weisblum et al., 2020). As such, additional mAbs or vaccines that retain  
68 efficacy against emerging SARS-CoV-2 variants may be needed to combat new and evolving  
69 strains.

70 In this study, we describe a panel of potentially neutralizing murine mAbs against the RBD  
71 of SARS-CoV-2 that bind several epitopes proximal to the receptor binding motif (RBM) of the  
72 RBD or at the base of the RBD. Although some neutralizing mAbs demonstrated limited ability  
73 to protect against infection by the historical SARS-CoV-2 WA1/2020 strain in a mouse disease  
74 model and selected for rapid escape *in vivo*, others protected completely in the context of  
75 prophylactic or therapeutic administration. Two protective mAbs, SARS2-02 and SARS2-38,  
76 showed variable capacity to neutralize variants of concern (VOCs): SARS2-02 binds an epitope  
77 that includes residues E484 and L452 and has reduced potency against strains (B.1.429, B.1.351,  
78 and B.1.1.28) encoding these mutations. In contrast, SARS2-38 binds an epitope centered on  
79 residues K444 and G446 and potently neutralized all tested VOCs. Analysis of a cryo-electron  
80 microscopy (cryo-EM) structure of SARS2-38 bound to spike reveals that this mAb binds a  
81 conserved epitope on the RBD that is also engaged, albeit through distinct geometries, by other  
82 neutralizing and protective human mAbs. Thus, treatment with mAbs or induction of pAbs  
83 targeting this conserved region of the RBD may confer protection against many emerging SARS-  
84 CoV-2 variants.

85 **RESULTS**

86 **Development and characterization of anti-SARS-CoV-2 mAbs.** We generated a panel  
87 of anti-SARS-CoV-2 mAbs from BALB/c mice that were immunized and boosted with purified  
88 RBD and/or ectodomain of the spike protein mixed with AddaVax™, a squalene-based adjuvant  
89 (**Fig 1**). After splenocyte-myeloma fusions, hybridoma supernatants were screened for antibody  
90 binding to recombinant spike protein and permeabilized SARS-CoV-2-infected Vero cells by  
91 ELISA and flow cytometry, respectively. Sixty-four hybridomas producing anti-SARS-CoV-2  
92 antibodies were cloned by limiting dilution. Forty-three of these mAbs bound to recombinant  
93 RBD and were selected for further study because prior experiments showed this class included  
94 potentially inhibitory antibodies (Barnes *et al.*, 2020; Baum *et al.*, 2020a; Cao *et al.*, 2020;  
95 Tortorici *et al.*, 2020; Zost *et al.*, 2020); the majority of these mAbs were of the IgG1 subclass  
96 (**Fig 1**).

97 The mAbs were evaluated by competition binding analysis using three previously  
98 characterized human mAbs that recognize distinct antigenic sites on the RBD (COV2-2196,  
99 COV2-2130, and CR3022) (Yuan *et al.*, 2020; Zost *et al.*, 2020) (**Fig 1**). Eight mAbs competed  
100 for spike protein binding with the neutralizing mAb COV2-2196 only, eight mAbs competed  
101 with the neutralizing mAb COV2-2130 only, four mAbs competed with both COV2-2196 and  
102 COV2-2130, and twenty mAbs competed with CR3022, which recognizes a more conserved,  
103 cryptic, and non-neutralizing epitope on the SARS-CoV-2 spike protein distal from the receptor  
104 binding site. Three RBD-binding mAbs did not compete with COV2-2196, COV2-2130, or  
105 CR3022. Based on the binding analysis, mAbs were divided into 5 competition groups, A-E (**Fig**  
106 **1**).

107           One potential mechanism of antibody-mediated neutralization of SARS-CoV-2 is through  
108 inhibition of viral spike protein binding to the human ACE2 receptor. The COV2-2196 epitope  
109 directly overlaps the ACE2 binding site on RBD, whereas the COV2-2130 epitope lies proximal  
110 to residues in the RBM that interact with ACE2 (Dong et al., 2021); nonetheless, both mAbs can  
111 block spike binding to ACE2. In contrast, CR3022 engages the base of the RBD and does not  
112 block ACE2 binding to spike (Yuan *et al.*, 2020). Of the 43 RBD-binding antibodies in our  
113 panel, all mAbs in groups A and B inhibited ACE2 binding to spike protein, mAbs in groups C  
114 and D variably inhibited ACE2 binding, and mAbs in group E failed to inhibit ACE2 binding  
115 (**Fig 1**).

116           The mAbs also were tested for cross-reactive binding to the SARS-CoV-1 spike protein.  
117 The majority of mAbs in group D, which competed with the cross-reactive mAb CR3022 for  
118 spike binding, cross-reacted with SARS-CoV-1 spike protein, indicating they bind conserved  
119 sarbecovirus epitopes. MAb in groups A, B, and C did not bind to SARS-CoV-1 (**Fig 1**), and  
120 one group E mAb recognized SARS-CoV-1.

121           **Neutralizing activity of anti-SARS-CoV-2 mAbs.** We next determined the neutralizing  
122 activity of mAb hybridoma supernatants using a focus-reduction neutralization test (FRNT) and  
123 Vero E6 cells (Case et al., 2020) with the WA1/2020 SARS-CoV-2 strain. Antibody  
124 concentrations in the supernatants were quantified by ELISA and used to calculate half-maximal  
125 inhibitory concentrations (EC50 values). The most potently inhibitory mAbs (EC50: < 10  
126 ng/mL) belonged to groups A, B, and C, and also blocked ACE2 binding (**Fig 1**). Some mAbs in  
127 group C and D that did not block ACE2 binding still showed robust neutralizing activity (EC50:  
128 20 – 100 ng/mL), although the majority were weakly inhibitory. Group E mAbs were weakly  
129 neutralizing and did not block ACE2 binding.

130 A subset of mAbs from groups A, B, C, and D were selected for more detailed study. We  
131 chose two mAbs with the highest neutralization potency from each group; in cases where mAbs  
132 had high variable region sequence similarity, we selected only one of these mAbs for further  
133 study. We also selected SARS2-03, as it was one of the few neutralizing mAbs that did not block  
134 ACE2 binding. Nine mAbs were purified from hybridoma supernatants and retested for  
135 neutralization potency by FRNT using Vero cells and the WA1/2020 isolate (**Fig 2A-B**). Again,  
136 the most potently neutralizing purified mAbs belonged to groups A, B, and C, with less  
137 inhibitory activity in those derived from group D. We also characterized these nine mAbs for  
138 competition binding with each other (**Fig S1**). The two group A mAbs (SARS2-34 and SARS2-  
139 71) competed for spike binding only with each other. In contrast, mAbs in groups B (SARS2-02  
140 and SARS2-55) and C (SARS2-01 and SARS2-38) competed for spike binding across both  
141 groups. SARS2-03, a group D mAb, did not bind spike efficiently in the presence of group B or  
142 C mAbs and blocked binding of group C mAb SARS2-01. SARS2-10 and SARS2-31, the other  
143 two group D mAbs, however, competed with only each other. Together, these results suggest that  
144 mAbs in group C may have overlapping epitopes with group B mAbs and group D mAb SARS2-  
145 03, whereas group A mAbs and the remaining group D mAbs likely engage physically distinct  
146 epitopes.

147 **Mechanism of neutralization by anti-SARS-CoV-2 mAbs.** We investigated whether  
148 the anti-SARS-CoV-2 mAbs inhibited infection at a pre- or post-attachment step of the entry  
149 process. For these experiments, we selected one representative mAb from groups A, B, and C  
150 (SARS2-34, SARS2-02, and SARS2-38, respectively) and two mAbs from group D (one that  
151 blocks ACE2 binding, [SARS2-10] and one that does not [SARS2-03]). We compared the  
152 neutralization potency of mAbs when added before or after virus absorption to Vero E6 cells.

153 Unexpectedly, all mAbs retained neutralizing activity when added post-attachment, although the  
154 potency of groups A, B, and C mAbs SARS2-02, SARS2-34, and SARS2-38 was reduced  
155 slightly (~2- to 4-fold,  $p < 0.05$ ) relative to pre-attachment neutralization titers (**Fig 2C-D**).  
156 SARS2-10, a group E mAb, also showed a ~5-fold decrease ( $p < 0.0001$ ) in neutralizing activity  
157 when added after attachment. In contrast, SARS2-03, another group E mAb, and the only mAb  
158 in this smaller panel that did not block ACE2-spike interactions, had similar neutralization  
159 potencies ( $p = 0.79$ ) when added before or after cell attachment. These data suggest that mAbs  
160 that inhibit spike protein binding to ACE2 neutralize SARS-CoV-2 slightly more efficiently  
161 when given at a pre-attachment step, although all of the mAbs tested retained the ability to  
162 inhibit infection when given after virus attachment to cells.

163 To determine the impact of entry factor expression on target cells on virus neutralization,  
164 we extended these findings to cells that ectopically express human ACE2 and TMPRSS2. In  
165 contrast to the relatively minor change in neutralization potency seen with all mAbs for pre-  
166 versus post-attachment observed using Vero E6 cells, mAbs no longer efficiently neutralized  
167 SARS-CoV-2 infection when added after attachment to Vero-TMPRSS2-ACE2 cells, although  
168 pre-attachment neutralization activity remained intact (**Fig 2E**). Thus, the ability of anti-SARS-  
169 CoV-2 mAbs to neutralize at a post-attachment step depended on expression levels of viral entry  
170 factors and the cell line.

171 We also tested the ability of the mAbs to block directly virus attachment to cells,  
172 including Vero E6, Vero-TMPRSS2, and Vero-TMPRSS2-ACE2 cells. None of the mAbs  
173 efficiently blocked SARS-CoV-2 attachment to Vero or Vero-TMPRSS2 cells (**Fig 2F**).  
174 However, with the exception of SARS2-03, all mAbs reduced virus attachment to Vero-  
175 TMPRSS2-ACE2. To corroborate these findings with cells that endogenously express human



176 ACE2, we repeated experiments with Calu-3 cells, a human lung epithelial cell line. We  
177 observed an intermediate phenotype with Calu-3 cells, with modest attachment inhibition by  
178 mAbs in groups A, B, and C; levels of attached virus were ~25-50% lower than the isotype mAb  
179 control with inhibition by only SARS2-38 attaining statistical significance (**Fig 2G**). This result  
180 suggests that the anti-RBD mAbs can inhibit viral attachment to cells, but this activity depends  
181 on levels of human ACE2 expression. Since the mAbs did not efficiently inhibit attachment to  
182 Vero E6 cells lacking human ACE2 expression, we tested whether they block a later step in the  
183 entry process by using a virus internalization assay (Dejarnac et al., 2018; Earnest et al., 2021).  
184 In Vero E6 cells, pre-incubation with all of the anti-RBD mAbs tested resulted in reduced levels  
185 of internalized virus (**Fig 2H**).

186 Because we observed cell type-dependent differences in the mechanism of neutralization,  
187 we tested the effect of cell substrate on the inhibitory potency of our anti-RBD mAbs by FRNT.  
188 Notably, the anti-RBD mAbs neutralized SARS-CoV-2 WA1/2020 equivalently in Vero E6,  
189 Vero-TMRPSS2, and Vero-TMPRSS2-ACE2 cells (**Fig S2**). Thus, although the mAbs variably  
190 block SARS-CoV-2 attachment on different cell types, the potency of infection inhibition was  
191 similar across cell substrates. This result may be explained by the ability of anti-RBD mAbs to  
192 block a required ACE2-dependent entry interaction in all of the cell substrates tested, even  
193 though the attachment step is variably affected.

#### 194 **Epitope mapping of anti-SARS-CoV-2 mAbs using neutralization escape analysis.**

195 To determine spike residues important for recognition by anti-SARS-CoV-2 mAbs, we  
196 previously isolated neutralization escape mutants by passaging a VSV-eGFP-SARS-CoV-2-S  
197 chimeric virus in the presence of neutralizing mAbs, including some of the antibodies described  
198 in this study (Liu *et al.*, 2021). The above described subset of nine mAbs from groups A-D were

199 tested for neutralization against the panel of sequenced mutants, with the exception of SARS2-10  
200 and SARS2-03, which were not evaluated because of difficulty in isolating escape mutants with  
201 mAbs of low neutralization potency. Neutralizing activity was lost for group A mAbs SARS2-34  
202 and SARS2-71 when residues 476-479, 486, and 499 were mutated; for group B mAbs SARS2-  
203 02 and SARS2-55 when residues 446, 452, and 484 were mutated; for group C mAb SARS2-01  
204 when residues 346, 352, 446, 450, and 494 were mutated; for group C mAb SARS2-38 when  
205 residues 444 and 446 were mutated; and for group D mAb SARS2-31 when residues 378, 408,  
206 and 504 were mutated (**Fig 3A-F**).

207 **Anti-SARS-CoV-2 mAbs protect against virus challenge *in vivo*.** We next tested the  
208 anti-SARS-CoV-2 mAbs for protection against the historical SARS-CoV-2 WA1/2020 virus *in*  
209 *vivo*. Eight- to ten-week-old K18 human ACE2 (hACE2) transgenic mice were administered a  
210 single 100 µg dose (~5 mg/kg) of anti-SARS-CoV-2 mAb 24 h prior to intranasal inoculation  
211 with 10<sup>3</sup> FFU of SARS-CoV-2 WA1/2020. Mice treated with the isotype control mAb lost up to  
212 25% body weight by 7 days post-infection (dpi), the designated endpoint of the study (**Fig 4A**).  
213 Mice treated with group A mAbs SARS2-71 and SARS2-34 maintained body weight until 6-7  
214 dpi, at which point we observed a 10% weight loss (**Fig 4A**). Mice treated with group B mAbs  
215 SARS2-02 and SARS2-55 and group C mAbs SARS2-01 and SARS2-38 all maintained body  
216 weight throughout the experiment (**Fig 4B-C**). Animals treated with group D mAbs SARS2-10,  
217 SARS2-31 or SARS2-03 generally were less protected against virus-induced weight loss (**Fig**  
218 **4D**).

219 To corroborate these findings, we measured the effect of mAb treatment on viral burden  
220 in the nasal washes and lungs on 7 dpi. The greatest decreases in viral RNA levels (~30 to 100-  
221 fold) in the nasal washes relative to isotype control mAb-treated mice were observed in animals

222 treated with mAbs in group B (SARS2-02 and SARS2-55) and group C (SARS2-01 and SARS2-  
223 38) (**Fig 4E**). The largest reductions in viral RNA levels in the lung (~100 to 1,000-fold) again  
224 were observed for mice treated with mAbs in group B (SARS2-02 and SARS2-55) and group C  
225 (SARS2-38) (**Fig 4F**). A smaller (~10-fold) decrement of virus RNA levels in the lung was  
226 observed for group C mAb SARS2-03. We also measured effects on infectious viral load in the  
227 lung by plaque assay for a subset of representative mAbs from each group. Whereas group A  
228 mAb SARS2-71 did not decrease the number of plaque-forming units (PFU) in the lung relative  
229 to the isotype control mAb-treated mice, SARS2-02, SARS2-38, and SARS2-03 all reduced  
230 infectious virus levels in the lung to the limit of detection of the assay (**Fig 4G**). The lack of  
231 protection conferred by SARS2-71 *in vivo* was unanticipated given its potent neutralizing  
232 activity in cell culture (EC<sub>50</sub> of 8 ng/mL, **Fig 2**). Sequencing of viral RNA from the lungs of  
233 SARS2-71-treated mice at 7 dpi revealed an S477N mutation in the RBD in all samples, which  
234 was not present in the input WA1/2020 virus. Notably, S477N also emerged *in vitro* as an escape  
235 mutant under SARS2-71 selection pressure using the VSV-eGFP-SARS-CoV-2-S virus (**Fig**  
236 **3A**). Thus, despite its potent inhibitory activity *in vitro*, SARS2-71 likely failed to protect *in vivo*  
237 because of rapid emergence of a fully pathogenic escape mutant.

238 To evaluate further the level of protection conferred by a subset of mAbs in our panel, we  
239 measured levels of cytokines and chemokines in lung tissues at 7 dpi, which are markers of the  
240 inflammatory and pathological outcomes in this mouse model (Golden et al., 2020; Oladunni et  
241 al., 2020; Winkler et al., 2020; Yinda et al., 2021). SARS2-38 and SARS2-02 treatment resulted  
242 in substantially reduced cytokine and chemokine levels relative to isotype control mAb-treated  
243 mice, with levels equivalent to those seen in naïve mice (**Fig S3**). In contrast, treatment with

244 SARS2-71 and SARS2-03 did not result in these reductions, with cytokine and chemokine levels  
245 similar to isotype-control treated and infected mice.

246 To test for post-exposure therapeutic protection against SARS-CoV-2 challenge, we  
247 cloned the variable regions of group B mAb SARS2-02 and group C mAb SARS2-38 and  
248 inserted them into a human IgG1 backbone to make chimeric antibodies. We did this since  
249 chimeric, humanized, or fully-human mAbs are more likely to be used in humans, and because  
250 Fc effector functions contribute to the therapeutic activity of neutralizing SARS-CoV-2 mAbs *in*  
251 *vivo* (Winkler et al., 2021); the original murine IgG1 isotype of these mAbs binds poorly to the  
252 activating murine FcγRI and FcγRIV, whereas human IgG1 binds these murine Fc receptors with  
253 higher affinity and thus could have enhanced effector function (Dekkers et al., 2017). We  
254 confirmed the neutralizing activity of the chimeric mAbs hSARS2-02 and hSARS-38 relative to  
255 the original murine IgG1 versions of the mAbs (**Fig S4**). Next, we inoculated K18-hACE2 mice  
256 with 10<sup>3</sup> FFU of SARS-CoV-2 WA1/2020. Twenty-four hours later, we administered a single  
257 200 μg (10 mg/kg) dose of hSARS2-02, hSARS2-38, or an isotype control mAb. Both hSARS2-  
258 02 and hSARS2-38 protected against weight loss following infection (**Fig 4H**). At 7 dpi,  
259 hSARS2-38 reduced viral RNA levels in the lung and heart by ~10,000-fold, whereas hSARS2-  
260 02 reduced infection by only ~10-100 fold in these tissues (**Fig 4I**).

261 **Neutralization of variants of concern by anti-SARS-CoV-2 mAbs.** We tested the two  
262 mAbs (SARS2-02 and SARS2-38) that conferred the greatest protection against WA1/2020 *in*  
263 *vivo* for neutralization of viruses with spike proteins corresponding to circulating variants of  
264 concern (VOCs). Recombinant chimeric WA1/2020 viruses encoding the spike protein from  
265 B.1.351 or B.1.1.28 were utilized for these studies (Wash-1.351 and Wash-1.1.28), as well as  
266 WA1/2020 with an introduced D614G mutation; we also tested viral isolates B.1.1.7, B.1.429,

267 B.1.1.298, and B.1.222. Several of these VOCs encode amino acid changes in spike that can  
268 affect mAb binding (**Fig 5A**) (Chen *et al.*, 2021d; Shen *et al.*, 2021; Wang *et al.*, 2021), including  
269 changes we identified in our VSV-eGFP-SARS-CoV-2-S escape mutant panel: L452R and  
270 E484K both showed reduced sensitivity to neutralization of VSV-eGFP-SARS-CoV-2-S by  
271 group B mAbs SARS2-02 and SARS2-55. Indeed, SARS2-02 exhibited reduced (~50-100-fold)  
272 neutralizing activity against authentic SARS-CoV-2 strains with E484K (Wash-B.1.351 and  
273 Wash-B.1.1.28) or L452R (B.1.429) substitutions (**Fig 5B and C**). Notably, SARS2-38 did not  
274 lose potency against any of the variant viruses, with EC50 values ranging from 1-4 ng/mL across  
275 the panel tested (**Fig 5D and E**).

276 To expand on this analysis, we tested the VSV-eGFP-SARS-CoV-2-S viruses that were  
277 resistant to SARS2-02 and SARS2-38 for neutralization using full dose response curves analysis.  
278 SARS2-02 showed ~20-fold reduced potency against E484K, ~100-fold reduced potency against  
279 L452R and G446V, and did not neutralize G446D at the highest concentration of mAb tested  
280 (**Fig 5F**). SARS2-38 showed virtually no neutralizing activity against K444E, K444N, G446D,  
281 or G446V mutants even at the highest concentration (1 µg/ml) of mAb tested (**Fig 5G**). Despite  
282 these results with VSV-eGFP-SARS-CoV-2-S viruses, when we serially passaged authentic  
283 WA1/2020 D614G or Wash-B.1.351 SARS-CoV-2 in Vero-TMPRSS2-ACE2 cells in the  
284 presence of neutralizing mAbs, we readily isolated resistant viruses following SARS-02 but not  
285 SARS2-38 selection with both strains.

286 We tested SARS2-02 and SARS2-38 for protection against Wash-B.1.351 in K18-hACE2  
287 mice. Animals treated with 100 µg of either SARS2-02 or SARS2-38 24 h prior to infection were  
288 protected from weight loss (**Fig 5H**), despite the reduced neutralization potency of SARS2-02  
289 against Wash B.1.351. SARS2-38 treatment greatly reduced viral titers in the lung, nasal washes,

290 heart, and brain at 7 dpi compared to the isotype control-treated mice, whereas SARS2-02 had  
291 less of a protective effect (**Fig 5I**). When hSARS2-02 and hSARS2-38 were administered to the  
292 K18-hACE2 transgenic mice as therapy 24 h after infection with Wash-B.1.351, a similar  
293 phenotype was observed: while they both protected mice against weight loss (**Fig 5J**), hSARS2-  
294 38 resulted in a greater reduction in viral titers at 7 dpi in the lung, heart, and brain than  
295 hSARS2-02 (**Fig 5K**).

296 **SARS2-38 targets the proximal RBM ridge with extensive light chain contact.** To  
297 define further the mechanistic basis for the broad and potent neutralization by SARS2-38, we  
298 first analyzed the interaction of antigen binding fragments (Fab) of SARS2-38 with SARS-CoV-  
299 2 spike using biolayer interferometry (BLI). SARS2-38 bound spike with high monovalent  
300 affinity (kinetically derived  $K_D$  of 6.5 nM) and had a half-life of 4.8 min (**Fig S5A**). To  
301 understand the basis for this binding structurally, we performed cryo-electron microscopy (cryo-  
302 EM) on complexes of SARS2-38 Fab and the SARS-CoV-2 spike protein (**Fig S5B**). We  
303 generated three-dimensional classes to sample the conformational landscape of the Fab/spike  
304 complex, and the class of highest resolution was refined further. This class consisted of trimeric  
305 spike with all RBDs in the down position (D/D/D) and one RBD bound by Fab (**Fig 6A and**  
306 **S6A-B**). Using non-uniform refinement, we achieved an overall resolution of 3.20 Å, with local  
307 resolution ranging from ~2.5 Å in the core of the spike to ~5.5 Å in the constant region of the  
308 Fab, which was visible only at high contour (**Fig S6B-D**). Other binding configurations also were  
309 seen, the most predominant consisting of spike with one RBD up and two RBDs down (U/D/D),  
310 with only the up RBD bound by Fab (31.1%). Less frequently, all three RBDs were bound by  
311 Fab in the U/D/D conformation (22.0%; **Fig S5B**). Although SARS2-38 could bind SARS-CoV-  
312 2 spike with full occupancy, 61.1% of spike trimers were bound only by a single Fab molecule.

313 To improve resolution at the Fab/RBD interface in the D/D/D reconstruction, we  
314 performed a focused, local refinement of the SARS2-38 variable domain (Fv) and RBD,  
315 excluding the rest of the spike and the constant region of the Fab. This reconstruction of the  
316 Fv/RBD complex achieved a resolution of 3.16 Å, allowing unambiguous placement of the  
317 protein backbone, secondary structures, and most side chains at the interface (**Fig S5B and S6E-**  
318 **F**). The SARS2-38 Fv sits atop three loops protruding at the proximal end of the RBM between  
319 helix  $\alpha$ 1 and strand  $\beta$ 1 (contact residues T345-R346), strands  $\beta$ 4 and  $\beta$ 5 (N439-G446, N448-  
320 Y451), and strand  $\beta$ 6 and helix  $\alpha$ 5 (S494 and Q498-T500; **Fig 6A-B**); these results correspond  
321 well with our VSV-based escape mutant mapping (**Fig 3**). All three light chain CDRs contact  
322 loop  $\beta$ 4- $\beta$ 5, with CDR2 and CDR3 forming additional contacts with loops  $\alpha$ 1- $\beta$ 1 and  $\beta$ 6- $\alpha$ 5,  
323 respectively. In comparison, the heavy chain interacts in a more limited manner with loops  $\beta$ 4- $\beta$ 5  
324 and  $\beta$ 6- $\alpha$ 5 via CDR2 and CDR3. CDR1 of the heavy chain makes no contact at all with the RBD.  
325 The heavy chain does, however, engage ACE2 contact residues of the RBM (**Fig 6A, right**  
326 *panel*). This and other steric effects likely explain the inhibition of ACE2 binding by SARS2-38.

327 **The SARS2-38 epitope is conserved among circulating SARS-CoV-2 variants of**  
328 **concern.** SARS2-38 potently neutralized all tested VOCs. To understand this broadly-  
329 neutralizing activity, we mapped the SARS2-38 epitope alongside VOC mutations within the  
330 RBD (**Fig 6B, left panel and Fig 6C**). One mutation in the SARS2-38 footprint, N439K, is  
331 present in variant B.1.222 and resides at the periphery of the epitope. However, B.1.222  
332 remained sensitive to neutralization by SARS2-38, and escape mutants at this residue were not  
333 generated *in vitro*, suggesting that N439 is not critical for SARS2-38 binding. The SARS2-38  
334 epitope includes no other residues corresponding to VOC mutations, which explains its  
335 performance against these variants. Notwithstanding this, we could select escape mutations *in*

336 *vitro* in the context of VSV-eGFP-SARS-CoV-2-S chimeric virus, namely K444E/N and  
337 G446D/V substitutions, which reside on the  $\beta$ 4- $\beta$ 5 loop central to the SARS2-38 epitope (**Fig**  
338 **6B-C**). The substitutions generated at K444 result in a loss of positive charge (K444N) or charge  
339 reversal (K444E), whereas the mutation at G446 may distort the entire loop structure; in our  
340 model, G446 adopts a stereochemistry unique to the glycine residue ( $\phi = 108^\circ$  and  $\psi = -19^\circ$ ).  
341 This structural analysis likely explains the resistance conferred by these amino acid substitutions.

342 To understand the efficacy of SARS2-38 amidst the landscape of all circulating variants,  
343 we used the COVID-19 CoV Genetics Browser ([covidcg.org](https://covidcg.org)) to probe RBD sequences in the  
344 GISAID database (786,273 isolates as of March 28, 2021; Chen et al., 2021; Shu et al., 2017).  
345 We then developed a log-scale conservation score for RBD residues 333-520. In this model,  
346 perfect conservation of the reference amino acid (from 2019n-CoV/WA1/2020) across all  
347 isolates corresponds to a score of 1, and complete loss of the reference amino acid results in a  
348 score of 0. Visualizing these scores on a color-coded RBD surface rendering (blue = 1, more  
349 conserved; red = 0, more variable) revealed that the RBM is generally more variable than the rest  
350 of the RBD, with VOCs clearly seen as red patches (**Fig 6B**, *right panel*). This analysis also  
351 suggested that in addition to not being affected by the VOCs tested in this study, SARS2-38  
352 targets a portion of the RBM that is conserved among circulating SARS-CoV-2 variants. The  
353 positions at which we identified escape mutants using VSV-eGFP-SARS-CoV-2-S chimeric  
354 viruses were substituted in only 0.02% (K444) and 0.04% (G444) of isolates, with the specific  
355 escape mutations (K444E/N and G446D/V) observed in only 0.007% and 0.03% of isolates  
356 respectively. Overall, 99.96% of isolates lacked the escape mutations for SARS2-38 identified in  
357 our study.

358



359 **DISCUSSION**

360           In this study, we describe and characterize extensively a panel of mAbs that bind the  
361 RBD of the SARS-CoV-2 spike protein. Several anti-RBD mAbs protected *in vivo* against  
362 SARS-CoV-2 infection in K18-hACE2 transgenic mice. While the less potently neutralizing  
363 mAbs directed against epitopes on the base of RBD (SARS2-10, SARS2-31, and SARS2-03)  
364 exhibited diminished protection against weight loss, induction of inflammatory cytokines and  
365 chemokines in the lung, and viral infection in the lung and nasal wash than mAbs recognizing  
366 the RBM, neutralization potency was not the only predictor of *in vivo* efficacy. Indeed, SARS2-  
367 71 neutralized SARS-CoV-2 with a potency similar to that of protective mAbs SARS2-02 and  
368 SARS2-38, yet failed to confer protection in mice. Notwithstanding this result, antibodies  
369 targeting proximal competing epitopes as SARS2-71, such as COV2-2196, have been shown to  
370 confer protection *in vivo* (Zost *et al.*, 2020). The failure of SARS2-71 to protect in particular is  
371 likely due to the emergence of the escape variant S477N *in vivo*. This finding demonstrates that  
372 SARS-CoV-2 can rapidly escape from mAb inhibition *in vivo*, and that mAb or mAb cocktails  
373 that prevent or limit rapid escape mutant generation likely will have greater therapeutic utility.  
374 While currently authorized mAb treatments include cocktails, the emergence of VOCs that are  
375 resistant to one or both component mAbs could compromise drug efficacy.

376           The most potently inhibitory mAbs in our panel bind epitopes within or proximal to the  
377 RBM and inhibit spike interaction with human ACE2 by ELISA, as observed for other anti-  
378 SARS-CoV-2 mAbs (Zost *et al.*, 2020). Several of these mAbs inhibited viral attachment to  
379 Calu-3 and Vero-TMPRSS2-ACE2 cells, but not to Vero E6 cells or Vero-TMPRSS2 cells.  
380 Infection of Vero E6 cells by SARS-CoV-2 is dependent on endogenous levels of monkey ACE2  
381 expression, as pretreatment with anti-ACE2 mAbs inhibits infection (Hoffmann *et al.*, 2020).

382 However, other host factors such as heparan sulfate also can mediate virus attachment to cells  
383 (Chu et al., 2021; Clausen et al., 2020). If binding to other cell surface ligands occurs prior to the  
384 RBD-ACE2 interaction, mAbs that block ACE2 binding may not efficiently inhibit SARS-CoV-  
385 2 attachment, but instead block a downstream ACE2-dependent entry step. This idea is supported  
386 by our data showing that several neutralizing mAbs block viral internalization in Vero E6 cells.  
387 Moreover, anti-RBD mAbs have only moderate decreases in neutralization potency when added  
388 after virus absorption to Vero E6 cells. In contrast, when SARS-CoV-2 attaches to the cell  
389 surface via human ACE2 interaction, such as in Vero-TMPRSS2-ACE2 cells, the addition of  
390 anti-RBD mAbs after attachment failed to neutralize virus infection. A higher density of ACE2  
391 or higher affinity of spike protein for human ACE2 (relative to monkey ACE2) on the Vero-  
392 TMPRSS2-ACE2 cells may drive initial virus attachment through the RBD-ACE2 interaction  
393 and explain why mAbs can block this step in these cells. Together, these data suggest that the  
394 ability of anti-RBD mAbs to inhibit SARS-CoV-2 attachment depends on cellular ACE2  
395 expression levels and thus can be cell-type dependent. As these mechanistic differences did not  
396 markedly affect mAb potency on the different cellular substrates, we conclude that in the cells  
397 we tested there is a required entry interaction with ACE2 either at attachment, post-attachment,  
398 or internalization steps.

399 Several mutations and deletions in emerging VOCs occur in the NTD and RBD that  
400 allow them to avoid antibody recognition, including RBD mutations K417N/T (B.1.351 and  
401 B.1.1.28), N439K (B.1.222), L452R (B.1.429), Y453R (B.1.1.298), E484K (B.1.351 and  
402 B.1.1.28), and N501Y (B.1.1.7, B.1.351, and B.1.1.28) (reviewed by (Plante et al., 2021)),  
403 highlighting the importance of developing mAbs against a variety of spatially distinct epitopes.  
404 In our panel, SARS2-38 potently neutralized viruses encoding any of the above mutations, did

405 not readily select for escape mutations with authentic SARS-CoV-2 strains, and retained  
406 therapeutic activity *in vivo* against a virus containing substitutions of one of the key VOCs  
407 (B.1.351). Moreover, functional mapping and structural analysis of the binding footprint of  
408 SARS-CoV-2 defined a conserved RBD epitope that could be recognized by other potently  
409 neutralizing and protective human mAbs.

410         Relatively few antibodies targeting similar epitopes to SARS2-38 have been described,  
411 and those characterized bind the RBD in distinct orientations with heavy chain predominance  
412 (**Fig 7A**). These include murine mAb 2H04, as well as human mAbs REGN10987, COV2-2130,  
413 and, though less similar, S309 (Dong *et al.*, 2021; Hansen *et al.*, 2020; Liu *et al.*, 2021; Pinto *et*  
414 *al.*, 2020). SARS2-38 differs in two respects: (a) the baseline neutralizing activity of SARS2-38  
415 against WA1/2020 in Vero cells (EC<sub>50</sub>, ~5 ng/mL) is 30-fold, 20-fold, and 16-fold more potent  
416 than that of 2H04, COV2-2130, and S309, respectively (Alsoussi *et al.*, 2020; Pinto *et al.*, 2020;  
417 Zost *et al.*, 2020); and (b) SARS2-38 retains strong neutralization potency against all VOCs  
418 evaluated in this study, whereas the inhibitory activity 2H04, COV2-2130, and S309 is reduced  
419 somewhat against B.1.1.7, B.1.429, and B.1.351, respectively ((Chen *et al.*, 2021c; Chen *et al.*,  
420 2021d) and R.E.C. and M.S.D. unpublished results). Similarly, REGN10987 exhibited a 10-fold  
421 reduction in neutralizing activity against B.1.429 compared to WA1/2020 (Chen *et al.*, 2021c;  
422 Hansen *et al.*, 2020; Wang *et al.*, 2021). A structural examination of these other antibody  
423 footprints within the context of VOC mutations does not provide a direct explanation for some of  
424 the resistance (**Fig 7B**). Instead, allostery may play a role. Whereas other broadly and potently  
425 neutralizing mAbs (including mAbs 2C08, COV2-2196, 58G6, 510A5, and S2X259) have been  
426 reported that bind RBD epitopes at residues G476, F486, and N487, or loops near residues 369-  
427 386, 404-411, 450-458, and 499-508 (Dong *et al.*, 2021; Li *et al.*, 2021; Schmitz *et al.*, 2021;

428 Tortorici et al., 2021), SARS2-38 targets a distinct epitope proximal to the RBM and has been  
429 evaluated functionally against a larger panel of authentic viruses containing sequences  
430 corresponding to emerging SARS-CoV-2 variants.

431 In summary, we have characterized a panel of anti-SARS-CoV-2 mAbs, defined their  
432 cellular mechanism of action in different cells, tested *in vitro* neutralizing and *in vivo* protection  
433 capacity against historical and circulating variants, and determined the structure of the viral spike  
434 protein bound to SARS2-38, a potently and broadly neutralizing mAb that recognizes emerging  
435 VOCs. A humanized version of SARS2-38 confers therapeutic protection against the WA1/2020  
436 isolate and a SARS-CoV-2 strain expressing the spike protein of B.1.351. The conserved epitope  
437 bound by SARS2-38 thus may be a potential target for antibodies with therapeutic potential or  
438 that are induced by effective vaccines with more limited potential for resistance against VOCs.

439

440 **ACKNOWLEDGEMENTS**

441 This study was supported by contracts and grants from NIH (75N93019C00062,  
442 HHSN272201700060C, 75N93019C00074, U01 AI151810, R01 AI118938, and R01  
443 AI157155), and the Defense Advanced Research Project Agency (HR001117S0019). J.B.C. is  
444 supported by a Helen Hay Whitney Foundation postdoctoral fellowship. This work also was  
445 funded by a generous gift from Washington University. We gratefully acknowledge the  
446 originating and submitting laboratories who generated and shared genetic sequence data via the  
447 GISAID Initiative. We also thank Charles Chiu and Raul Andino for providing the B.1.429  
448 isolate and Barney Graham for cell lines and experimental advice.

449

450 **AUTHOR CONTRIBUTIONS**

451 Conceptualization and Methodology, L.A.V., M.S.D., L.J.A., D.H.F., Z.L., and S.P.J.W;  
452 Investigation, L.A.V., L.J.A., Z.L., R.E.C., P.G., S.R., B.K.S., J.B.C., B.M.W., L.D., and I.D.A.;  
453 Formal analysis, L.J.A. and S.A.H.; Key reagents, E.S.W., H.Z., P-Y.S., A.P., and A.C.;  
454 Supervision and funding, M.S.D., D.H.F., D.W., A.C.M.B., J.E.C., and S.P.J.W; Writing –  
455 original draft, L.A.V., L.J.A., and M.S.D.; Writing – review and editing, all authors.

456

457 **CONFLICT OF INTERESTS STATEMENT**

458 M.S.D. is a consultant for Inbios, Vir Biotechnology, Fortress Biotech, and Carnival  
459 Corporation and on the Scientific Advisory Boards of Moderna and Immunome. The Diamond  
460 laboratory has received unrelated funding support in sponsored research agreements from  
461 Moderna, Vir Biotechnology, and Emergent BioSolutions. D.H.F is a founder of Courier  
462 Therapeutics and has received unrelated funding support in a sponsored research agreement from

463 Emergent BioSolutions. J.E.C. has served as a consultant for Eli Lilly and Luna Biologics, is a  
464 member of the Scientific Advisory Boards of CompuVax and Meissa Vaccines and is Founder of  
465 IDBiologics. The Crowe laboratory at Vanderbilt University Medical Center has received  
466 sponsored research agreements from AstraZeneca and IDBiologics. The Boon laboratory has  
467 received funding support in sponsored research agreements from AI Therapeutics, GreenLight  
468 Biosciences., AbbVie, and Nano targeting & Therapy Biopharma.

469 **FIGURE LEGENDS**

470 **Figure 1. Panel of anti-SARS-CoV-2 mAbs.** Hybridoma supernatants from the panel of  
471 anti-SARS-CoV-2 murine mAbs were assayed for neutralization of SARS-CoV-2 by FRNT,  
472 cross-reactivity to SARS-CoV-1 spike protein, and ability to inhibit SARS-CoV-2 spike protein  
473 binding to hACE2 or a panel of reference human mAbs through competition ELISA. MAbs are  
474 grouped by reference mAb competition properties. Data represent the mean (or geometric mean  
475 for EC50 values) from two to four independent experiments. Hybridomas were produced from  
476 splenocytes of mice that received three immunizations (once with the RBD and then twice with  
477 Spike) prior to a final pre-fusion boost with either RBD or Spike, as indicated in the ‘Final  
478 Boost’ column.

479 **Figure 2. Neutralization by anti-SARS-CoV-2 mAbs. (A-B)** Anti-SARS-CoV-2 mAbs  
480 were assayed for neutralization by FRNT against SARS-CoV-2 using Vero E6 cells. **(A)**  
481 Representative dose response curves are shown. **(B)** Mean EC50 values are shown; data are from  
482 three to four experiments. **(C-D)** Anti-SARS-CoV-2 mAbs were assayed for pre- or post-  
483 attachment neutralization of SARS-CoV-2 using Vero E6 cells. **(C)** Fold change in EC50 values  
484 for post-attachment over pre-attachment neutralization. Error bars represent standard error of the  
485 mean (SEM) from four experiments **(D)** Representative dose response curves are shown. **(E)**  
486 Anti-SARS-CoV-2 mAbs were assayed for pre- or post-attachment inhibition on Vero-  
487 TMPRSS2-ACE2 cells. Dose response curves are shown. Data are representative of three  
488 experiments. **(F-G)** Anti-SARS-CoV-2 mAbs were assayed for attachment inhibition of SARS-  
489 CoV-2 to Vero E6, Vero-TMPRSS2, or Vero-TMPRSS2-ACE2 **(F)** or Calu-3 **(G)** cells. Data are  
490 from three **(F)** to six **(G)** experiments. **(H)** Anti-SARS-CoV-2 mAbs were assayed for inhibition  
491 of virus internalization in Vero E6 cells. Data are from four experiments. **C.** ANOVA with

492 Sidak's post-test comparing pre- vs. post-attachment EC50 values for each mAb; **F-H**. One-way  
493 ANOVA with Dunnett's post-test compared mAb treatment to isotype control mAb treatment.  
494 ns, not significant; \* $p < 0.05$ ; \*\* $p < 0.01$ ; \*\*\* $p < 0.001$ , \*\*\*\* $p < 0.0001$ .

495 **Figure 3. Epitopes recognized by anti-SARS-CoV-2 mAbs.** mAbs were tested for  
496 neutralization potency against a panel of VSV-eGFP-SARS-COV-2-S neutralization escape  
497 mutants. (A) "+" symbol indicates resistance to neutralization when a mutation at the indicated  
498 residue number is present. (B-F) Residues from (A) are highlighted on the RBD structure (PDB  
499 6M0J) in red, orange, green, or cyan for mAbs from group **A, B, C, or D**, respectively, and  
500 indicated. Residues that engage hACE2 are highlighted in tan.

501 **Figure 4. Anti- SARS-CoV-2 mAbs protect against SARS-CoV-2 infection *in vivo*.**  
502 (A-G) K18-hACE2 transgenic mice were passively administered 100  $\mu\text{g}$  (5 mg/kg) of the  
503 indicated mAb by intraperitoneal injection 24 h prior to intranasal inoculation with  $10^3$  FFU of  
504 SARS-CoV-2 WA1/2020. (A-D) Mice were monitored for weight change for 7 days following  
505 viral infection. Mean weight change is shown. Error bars represent SEM. (E-F) At 7 dpi, nasal  
506 washes (E), and lungs (F) were collected, and viral RNA levels were determined. Median levels  
507 are shown; top dotted line indicates median viral load of control mAb-treated mice; bottom  
508 dotted line represents the limit of detection (LOD) of the assay. (H) A subset of the lungs from  
509 (F) were assessed for infectious viral burden by plaque assay. Median PFU/mL is shown. Dotted  
510 line indicates the LOD. (A-F) Data for each mAb are from two experiments; WEEV-204  
511 (isotype control):  $n = 12$ ; all other mAbs:  $n = 5-6$  per group. (H-I) K18-hACE2 transgenic mice  
512 were passively given 200  $\mu\text{g}$  (10 mg/kg) of the indicated mAb by intraperitoneal injection 24 h  
513 after intranasal inoculation with  $10^3$  PFU of SARS-CoV-2 WA1/2020. Data are from two or  
514 three experiments; WEEV-204 (isotype control):  $n = 10$ ; SARS2-02 and SARS2-38:  $n = 6$  per



515 group. **(H)** Mean weight change is shown. Error bars represent SEM. **(I)** At 7 dpi, lung, nasal  
516 washes, heart, and brain were collected and viral RNA levels were determined. **(A-D and H)**  
517 One-way ANOVA with Dunnett's post-test of area under the curve. ns, not significant;  
518 \*\*\*\*p<0.0001. **(E, F, and I)** Kruskal-Wallis with Dunn's post-test: ns, not significant, \*p<0.05,  
519 \*\* p<0.01, \*\*\*p < 0.001, \*\*\*\*p < 0.0001.

520 **Figure 5. Neutralization of variants of concern by anti-SARS-CoV-2 mAbs.** **(A)**  
521 Variants of concern (VOC) and their mutations in spike. SARS2-2 **(B-C)** and SARS2-38 **(D-E)**  
522 were tested for neutralization of the indicated variants by FRNT. **(B and D)** Representative dose  
523 response curves are shown. **(C and E)** Mean EC50 values are shown; data are from three to five  
524 experiments. **(F-G)** Representative dose response curves of SARS2-02 and SARS2-38  
525 neutralization of VSV-eGFP-SARS-CoV-2-S and the indicated neutralization-resistant mutants.  
526 Data is from of one of two experiments. **(H-I)** K18-hACE2 mice were administered 100 µg (5  
527 mg/kg) of the indicated mAb by intraperitoneal injection 24 h prior to intranasal inoculation with  
528 10<sup>3</sup> FFU of SARS-CoV-2 Wash-B.1.351. **(H)** Mean weight change is shown. Error bars  
529 represent SEM. **(I)** At 6 dpi, the indicated tissues were collected, and viral RNA levels were  
530 determined. Data are from two experiments; WEEV-204 (isotype control) and SARS2-38: n = 7;  
531 SARS2-02: n = 6. **(J-K)** K18-hACE2 mice were inoculated with 10<sup>3</sup> FFU of SARS-CoV-2  
532 Wash-B.1.351, and 24 h later they were administered 200 µg (10 mg/kg) of the indicated mAb.  
533 **(J)** Mean weight change is shown. Error bars represent SEM. **(K)** At 6 dpi, the indicated tissues  
534 were collected, and viral RNA levels were determined. Data are from two experiments; hWNV-  
535 E16 and hSARS2-02: n=6; hSARS2-38: n=8). **(H and J)** One-way ANOVA with Dunnett's post-  
536 test of area under the curve. \*\*p<0.01; \*\*\*\*p<0.0001. **(I and K)** Kruskal-Wallis with Dunn's  
537 post-test: ns, not significant, \*p < 0.05, \*\*p < 0.01, \*\*\*p<0.001, \*\*\*\*p < 0.0001.

538           **Figure 6. SARS2-38 targets a conserved portion of the RBM with extensive light**  
539 **chain contact.** (A) *Left panel.* Density map of SARS2-38 Fv bound to trimeric SARS-CoV-2  
540 spike protein with all RBDs in the down position. The spike monomer bound by SARS2-38 is  
541 shown in yellow with the rest of the trimer colored gray. The SARS2-38 heavy chain is shown in  
542 royal blue, and the light chain in cyan. *Middle panel.* Focused density map of the Fv/RBD  
543 complex encompassing a refined atomic model. The RBD is shown in yellow. The SARS2-38  
544 heavy and light chains are colored royal blue and cyan, respectively. *Right panel.*  
545 Complementarity-determining regions (CDRs) of SARS2-38 overlay a surface rendering of the  
546 RBD. CDRs from the heavy and light chains are colored royal blue and cyan, respectively, with  
547 the RBD colored yellow. ACE2-binding residues of the receptor binding motif (RBM) are  
548 outlined in green. (B) *Left panel:* a ribbon diagram of the RBD and SARS2-38 CDRs with  
549 escape mutations and variants of concern (VOCs) noted in purple and red, respectively. The  
550 RBD is otherwise colored yellow, with a gray glycan linked to N343. CDRs of the SARS2-38  
551 heavy and light chain are colored royal blue and cyan, respectively. *Right panel:* surface  
552 renderings of RBD colored according to conservation of surface residues (blue = conserved, red  
553 = variable). Escape mutations and VOCs are noted in purple and red, respectively. The SARS2-  
554 38 epitope is outlined in navy. (C) Multiple sequence alignment of RBD (residues 333-518) from  
555 WA1/2020, SARS-CoV-2 VOCs, SARS-CoV, and MERS-CoV, with the binding footprint of  
556 SARS2-38 boxed in blue. Mutations within SARS-CoV-2 VOCs are highlighted in red, and  
557 SARS2-38 escape mutation contacts are marked with purple triangles. Secondary structure  
558 annotation is displayed above the alignment in yellow with ACE2 contacts designated by green  
559 triangles (Lan et al., 2020). Divergent residues within SARS-CoV and MERS-CoV (relative  
560 to WA1/2020) are highlighted in gray.

561 **Figure 7. Similarity of SARS2-38 epitope to other mAbs.** (A) Structural comparison of  
562 SARS2-38 to mAbs targeting a similar region of the RBD. (B) Multiple sequence alignment of  
563 the SARS-CoV-2 RBD (residues 333-518) with mAb binding footprints as determined by  
564 qtPISA analysis. For SARS2-38, heavy chain, light chain, and shared contacts are shown in blue,  
565 cyan, and dark blue, respectively. For 2H04, heavy chain, light chain, and shared contacts are  
566 shown in orange, pale orange, and dark orange, respectively. For REGN10987, heavy chain,  
567 light chain, and shared contacts are shown in green, pale green, and dark green, respectively. For  
568 S309, heavy chain, light chain, and shared contacts are shown in magenta, pale purple, and  
569 purple, respectively. For COV2-2130, heavy chain, light chain, and shared contacts are shown  
570 in red, pale red, and brick red, respectively. Secondary structure annotation is displayed above  
571 the alignment in yellow, with ACE2 contacts designated by green triangles (Lan et al., 2020).  
572 VOC substitutions are designated below the alignment by red triangles.

573

#### 574 **SUPPLEMENTAL FIGURE LEGENDS**

575 **Figure S1. Competition profile of mAb panel, Related to Figure 1.** A subset of mAbs  
576 from each reference mAb competition group were tested for competition for SARS-CoV-2 spike  
577 binding against each other. Data represent mean of technical duplicates.

578 **Figure S2. Neutralization by anti-SARS-CoV-2 mAbs on different cell substrates,**  
579 **Related to Figure 2.** Anti-SARS-CoV-2 mAbs were assayed for neutralization by FRNT against  
580 SARS-CoV-2 using Vero E6, Vero-TMPRSS2, Vero-TMPRSS2-ACE2. (A) Representative dose  
581 response curves are shown. (B) Mean EC50 values are shown; data are from three experiments.

582 **Figure S3. Cytokine and chemokine levels in the lungs of SARS-CoV-2 infected mice**  
583 **following treatment with anti-SARS-CoV2 mAbs, Related to Figure 4.** Cytokine and

584 chemokine levels in lung homogenates harvested in **Fig 5** were measured by a multiplex  
585 platform. **(A)** Heat map showing Log<sub>2</sub> fold change in cytokine and chemokine levels compared  
586 to lungs from mock-infected animals. **(B)** Levels of each cytokine and chemokine are plotted.  
587 Data are from two experiments, n = 5-6 per group. One-way ANOVA with Dunnett's post- test:  
588 ns, not significant, \*p < 0.05, \*\*p < 0.01, \*\*\*p < 0.001, \*\*\*\*p < 0.0001.)

589 **Figure S4. Validation of chimeric mAb activity, Related to Figure 4.** Anti-SARS-  
590 CoV-2 chimeric mouse Fv/human IgG1 Fc mAbs were assayed for neutralization by FRNT  
591 against SARS-CoV-2 WA/2020. m, mouse hybridoma-derived mAb, and h, recombinant  
592 chimeric mAb. Representative dose response curves are shown. Data are from three experiments.

593 **Figure S5. Binding analysis and cryo-EM data processing pipeline, Related to**  
594 **Figure 6.** **(A)** Biolayer interferometry signal (left) and steady state analysis (right) of SARS2-38  
595 Fab interacting with immobilized SARS-CoV-2 spike. Kinetic values were fitted to a 1:1 binding  
596 model with a drifting baseline. **(B)** Flowchart depicting data processing steps for global  
597 reconstruction of SARS2-38 Fv bound to trimeric spike and local refinement of SARS2-  
598 38 Fv bound to RBD.

599 **Figure S6. Validation of global and local cryo-EM reconstructions of SARS2-**  
600 **38 Fv bound to SARS-CoV-2 spike/RBD, Related to Figure 6.** **(A)** Density map and fitted  
601 model of SARS2-38 Fv bound to trimeric SARS-CoV-2 spike. The spike monomer bound by  
602 SARS2-38 is shown in yellow, with the rest of the trimer colored gray. The SARS2-38 heavy  
603 chain is shown in royal blue, and the light chain in cyan. **(B)** Orientational distribution assigned  
604 to particles in global refinement of SARS2-38 Fv bound to trimeric spike. **(C)** GSFSC curve  
605 for global refinement of SARS2-Fv bound to trimeric spike. **(D)** Local resolution map for global  
606 refinement of SARS2-38 Fv bound to trimeric spike. **(E)** GSFSC curve for local refinement of

607 SARS2-Fv bound to RBD. (F) Example density and model fits for an RBD beta strand (left) and  
608 at the SARS2-38/RBD interface (right). RBD is depicted in yellow, and the SARS2-38 light  
609 chain is shown in cyan.

610 **Table S1. Cryo-EM data collection, processing, and model refinement statistics,**  
611 **Related to Figure 6.** Respective statistics are provided for local and global refinements of  
612 SARS2-38 Fv bound to SARS-CoV-2 RBD/spike.

613

614 **STAR METHODS**

615 **RESOURCE AVAILABILITY**

616 **Lead Contact.** Further information and requests for resources and reagents should be  
617 directed to the Lead Contact, Michael S. Diamond ([diamond@wusm.wustl.edu](mailto:diamond@wusm.wustl.edu)).

618 **Materials Availability.** All requests for resources and reagents should be directed to the  
619 Lead Contact author. This includes mice, antibodies, viruses, and proteins. All reagents will be  
620 made available on request after completion of a Materials Transfer Agreement.

621 **Data and code availability.** All data supporting the findings of this study are available  
622 within the paper and are available from the corresponding author upon request. Structural  
623 datasets have been uploaded and are available at PDB (accession codes 7MKL and 7MKM).

624

625 **EXPERIMENTAL MODEL AND SUBJECT DETAILS**

626 **Viruses.** The 2019n-CoV/USA\_WA1/2020 (WA1/2020) isolate of SARS-CoV-2 was  
627 obtained from the US Centers for Disease Control (CDC). WA1/2020 stocks were propagated on  
628 Vero CCL81 cells and used at passage 6 and 7. Viral titer was determined by focus-forming  
629 assay (FFA) on Vero E6 cells as described (Case *et al.*, 2020). The D614G virus was produced  
630 by introducing the mutation into an infectious clone of WA1/2020, and the B.1.351 and B.1.1.28  
631 Spike genes were cloned into the WA1/2020 infectious clone to produce Wash-B.1.351 and  
632 Wash-B.1.1.28 chimeric viruses, as described previously (Chen *et al.*, 2021d). The B.1.1.7,  
633 B.1.429, B.1.298, and B.1.222 isolates were isolated from infected individuals. Viruses were  
634 propagated on Vero-TMPRSS2 cells and subjected to deep sequencing to confirm the presence  
635 of the substitutions indicated in **Fig 5A**.

636           **Cells.** Cell lines were maintained at 37°C in the presence of 5% CO<sub>2</sub>. Vero E6 cells were  
637    passaged in Dulbecco's Modified Eagle Medium (DMEM) (Invitrogen) supplemented with 10%  
638    fetal bovine serum (FBS) (Omega Scientific) and 100 U/mL penicillin-streptomycin (P/S)  
639    (Invitrogen). Vero cells that over-express TMPRSS2 or TMPRSS2-ACE2 were maintained as  
640    Vero CCL81 cells, with the addition of 5 µg/mL blasticidin (Vero-TMPRSS2) or 10 µg/mL  
641    puromycin (Vero-TMPRSS2-ACE2). Calu-3 cells were maintained in DMEM with 20% FBS  
642    and 100 U/mL P/S.

643           **Proteins.** Genes encoding SARS-CoV-2 spike protein (residues 1-1213, GenBank:  
644    MN908947.3) and RBD (residues 319-514) were cloned into a pCAGGS mammalian expression  
645    vector with a C-terminal hexahistidine tag. The spike protein was prefusion stabilized and  
646    expression optimized via six proline substitutions (F817P, A892P, A899P, A942P, K986P,  
647    V987P) (Hsieh et al., 2020), with a disrupted S1/S2 furin cleavage site and a C-terminal foldon  
648    trimerization motif (YIPEAPRDGQAYVRKDG EWVLLSTFL). Expi293F cells were transiently  
649    transfected, and proteins were recovered via cobalt-charged resin chromatography (G-  
650    Biosciences) as previously described (Alsoussi et al., 2020; Hassan et al., 2020). For ACE2  
651    binding inhibition analysis, the SARS-CoV-2 spike protein was made by synthesizing a gene  
652    encoding the ectodomain of a prefusion conformation-stabilized SARS-CoV-2 spike (S6Pecto)  
653    protein (Hsieh *et al.*, 2020) containing C-terminal Twin-Strep-tag. The spike gene was then  
654    cloned it into a DNA plasmid expression vector for mammalian cells. Protein was produced in  
655    FreeStyle 293-F cells (Thermo Fisher Scientific) and purified from culture supernatants using  
656    StrepTrap HP affinity column (Cytiva).

657           **Mice.** Animal studies were carried out in accordance with the recommendations in the  
658    Guide for the Care and Use of Laboratory Animals of the National Institutes of Health. The

659 protocols were approved by the Institutional Animal Care and Use Committee at the Washington  
660 University School of Medicine (Assurance number A3381-01). Virus inoculations were  
661 performed under anesthesia that was induced and maintained with ketamine hydrochloride and  
662 xylazine, and all efforts were made to minimize animal suffering.

663 K18-hACE2 transgenic mice were purchased from Jackson Laboratories (#034860) and  
664 housed in a pathogen-free animal facility at Washington University in St. Louis. For passive  
665 transfer studies, mAbs were diluted in PBS and administered to mice via intraperitoneal injection  
666 in a 100  $\mu$ L total volume. Viral infections were performed via intranasal inoculation with  $10^3$   
667 FFU of virus. Mice were monitored daily for weight loss.

668

## 669 **METHOD DETAILS**

670 **MAb generation.** BALB/c mice were immunized with 10  $\mu$ g of SARS-CoV-2 RBD  
671 adjuvanted with 50% AddaVax™ (InvivoGen), via intramuscular route (i.m.), followed by i.m.  
672 immunization two and four weeks later with SARS-CoV-2 spike protein (5  $\mu$ g and 10  $\mu$ g,  
673 respectively) supplemented with AddaVax™. Mice received a final, non-adjuvanted boost of 25  
674  $\mu$ g of SARS-CoV-2 spike or RBD (12.5  $\mu$ g intravenously and 12.5  $\mu$ g interperitoneally) 3 days  
675 prior to fusion of splenocytes with P3X63.Ag.6.5.3 myeloma cells. Hybridomas producing  
676 antibodies that bound to SARS-CoV-2-infected permeabilized Vero CCL81 cells by flow  
677 cytometry and to SARS-CoV-2 recombinant spike protein by direct ELISA were cloned by  
678 limiting dilution. All hybridomas were screened initially with a single-endpoint neutralization  
679 assay using hybridoma supernatant diluted 1:3 and incubated with SARS-CoV-2 for 1 h at 37°C  
680 prior to addition to Vero E6 cells. Following a 30-h incubation, cells were fixed, permeabilized,  
681 and stained for SARS-CoV-2 infection with CR3022 as described (Case *et al.*, 2020). A subset of



682 neutralizing hybridoma supernatants were purified commercially (Bio-X Cell) after adaptation  
683 for growth under serum-free conditions.

684 **VSV-eGFP-SARS-CoV-2-S escape mutants.** VSV-eGFP-SARS-CoV-2-S escape  
685 mutants were produced as described previously (Liu *et al.*, 2021). Briefly, plaque assays were  
686 performed to isolate escape mutants on Vero-TMPRSS2 cells with neutralizing mAb in the  
687 overlay. Escape clones were plaque-purified on Vero-TMPRSS2 cells in the presence of mAb.  
688 Plaques in agarose plugs and viral stocks were amplified on MA104 cells at an MOI of 0.01 in  
689 Medium 199 containing 2% FBS and 20 mM HEPES pH 7.7 (Millipore Sigma) at 34°C. Viral  
690 supernatants were harvested upon extensive cytopathic effect and clarified of cell debris by  
691 centrifugation at 1,000 x g for 5 min.

692 **Determination of mAb concentration in hybridoma supernatant.** The mAb  
693 concentration in each hybridoma supernatant was quantified by ELISA. Nunc MaxiSorp plates  
694 (Thermo Fisher Scientific) were coated with 1 µg/mL of goat anti-mouse IgG (Southern Biotech)  
695 in 50 µL of NaHCO<sub>3</sub> (pH 9.6) coating buffer and incubated overnight at 4°C. Plates were washed  
696 three times with ELISA wash buffer (PBS containing 0.05% Tween-20), and then incubated with  
697 200 µL of blocking buffer (PBS, 2% BSA, 0.05% Tween-20) for 1 h at room temperature. Plates  
698 were incubated with hybridoma supernatant diluted 1:500 or 1:2000 in blocking buffer, or serial  
699 dilutions of purified isotype control mAb as a standard, for 1 h at room temperature. Plates were  
700 washed three times with ELISA wash buffer, and incubated with 50 µL of anti-mouse IgG-HRP  
701 (Sigma) diluted 1:500 for 1 h at room temperature. Plates were washed three times with ELISA  
702 wash buffer and three times with PBS, before incubation with 100 µL of TMB substrate (Thermo  
703 Fisher Scientific) for 3 min at room temperature before quenching with the addition of 50 µL of

704 2 N H<sub>2</sub>SO<sub>4</sub> and measuring OD 450 nm. Antibody concentrations in hybridoma supernatant were  
705 interpolated from a standard curve produced using an isotype control mAb.

706 **Spike and RBD binding analysis.** 96-well Maxisorp plates were coated with 2 µg/mL of  
707 SARS-CoV-2 spike or RBD protein in 50 mM Na<sub>2</sub>CO<sub>3</sub> (70 µL) overnight at 4 °C. Plates  
708 were washed three times with PBS + 0.05% Tween-20 and blocked with 200 µL of PBS + 0.05%  
709 Tween-20 + 1% BSA + 0.02% NaN<sub>3</sub> for 2 h at room temperature. 75 µL of blocking buffer and  
710 50 µL of hybridoma supernatant were combined, and 50 µL/well of diluted supernatants were  
711 added to the plates and incubated for 1 h at room temperature. Bound IgG was detected using  
712 HRP-conjugated goat anti-mouse IgG (at 1:2,000). Following a 1 h incubation, washed plates  
713 were developed with 50 µL of 1-Step Ultra TMB-ELISA, quenched with 2 N H<sub>2</sub>SO<sub>4</sub>, and the  
714 absorbance was read at 450 nm.

715 **Competition binding analysis.** The assay was performed as described previously (Zost  
716 *et al.*, 2020). Briefly, for screening study wells of 384-well microtiter plates were coated with 1  
717 µg/mL of purified SARS-CoV-2 S6P<sub>ecto</sub> protein at 4 °C overnight. Plates were blocked with 2%  
718 bovine serum albumin (BSA) in DPBS-T for 1 h. Mouse hybridoma culture supernatants were  
719 diluted five-fold in blocking buffer, added to the wells (20 µl per well) in duplicates for each  
720 tested reference mAb and incubated for 1 h at room temperature. Biotinylated reference human  
721 mAbs with known epitope specificity (COV2-2130, COV2-2196 (Zost *et al.*, 2020), and CR3022  
722 (ter Meulen *et al.*, 2006)) were added to each of well with the respective hybridoma culture  
723 supernatant at 1.25 µg/mL in a volume of 5 µl per well (final concentration of biotinylated mAb,  
724 0.25 µg/mL) without washing of the plates, and then incubated for 1 h at room temperature.  
725 Plates then were washed, and bound antibodies were detected using HRP-conjugated avidin  
726 (Sigma, A3151, 0.3 µg/mL final concentration) and a TMB substrate. The signal obtained for

727 binding of the biotin-labelled reference antibody in the presence of the hybridoma culture  
728 supernatant was expressed as a percentage of the binding of the reference antibody alone after  
729 subtracting the background signal. Tested mAbs were considered competing if their presence  
730 reduced the reference antibody binding to less than 41% of its maximal binding and non-  
731 competing if the signal was greater than 71%. A level of 40–70% was considered intermediate  
732 competition.

733 **Human ACE2 binding inhibition analysis.** The assay was performed as described  
734 previously (Zost *et al.*, 2020). Briefly, for screening study wells of 384-well microtiter plates  
735 were coated with 1 µg/mL purified recombinant SARS-CoV-2 S6P<sub>ecto</sub> protein at 4 °C overnight.  
736 Plates were blocked with 2% non-fat dry milk and 2% normal goat serum in DPBS-T for 1 h.  
737 Mouse hybridoma culture supernatants were diluted five-fold in blocking buffer, added to the  
738 wells (20 µl per well) in quadruplicate, and incubated for 1 h at room temperature. Recombinant  
739 human ACE2 with a C-terminal Flag tag peptide was added to wells at 2 µg/mL in a 5 µl per  
740 well volume (final 0.4 µg/mL concentration of human ACE2) without washing of the plates, and  
741 then incubated for 40 min at room temperature. Plates were washed and bound human ACE2 was  
742 detected using HRP-conjugated anti-Flag antibody (Sigma-Aldrich, A8592, 1:5,000 dilution) and  
743 TMB substrate. ACE2 binding without antibody served as a control for maximal binding.  
744 Antibody COV2-2196 (RBD) served as a control for ACE2 binding inhibition. The signal  
745 obtained for binding of the human ACE2 in the presence of each dilution of tested culture  
746 supernatant was expressed as a percentage of the human ACE2 binding without antibody after  
747 subtracting the background signal.

748 **Sequencing, cloning, and expression of chimeric IgG1.** To generate chimeric human  
749 IgG1 from mouse hybridoma cell lines, cells were lysed in Trizol (Thermo) followed by RNA

750 purification with Direct-Zol Micro kit (Zymo). 5' RACE products were generated with Template  
751 Switching RT Enzyme Mix (New England Biolabs) using anchored poly(dT)<sub>23</sub> and TSO (GCT  
752 AAT CAT TGC AAG CAG TGG TAT CAA CGC AGA GTA CAT rGrGrG) oligonucleotides  
753 according to the manufactures instructions. Heavy and light chain sequences were amplified with  
754 primers specific for the TSO handle-sequence and the respective constant region sequence with  
755 Q5 Polymerase (New England Biolabs). Following Sanger sequencing, full-length variable  
756 regions were synthesized as gene blocks (Integrated DNA Technologies) and cloned into hIgG1  
757 and hKappa expression vectors by Gibson assembly. Recombinant antibodies were expressed in  
758 Expi293 cells following co-transfection of heavy and light chain plasmids (1:1 ratio) using  
759 Expifectamine 293 (Thermo Fisher Scientific). Supernatants were harvested after 5-6 days,  
760 purified by affinity chromatography (Protein A Sepharose, GE), and desalted with a PD-10  
761 (Cytiva) column.

762 **Binding analysis via biolayer interferometry.** Biolayer interferometry (BLI) was used  
763 to quantify the binding capacity of SARS2-38 Fab fragments to trimerized SARS-CoV-2 spike.  
764 10 µg/mL of biotinylated spike was immobilized onto streptavidin biosensors (ForteBio) for 3  
765 min. After a 30 sec wash, the pins were submerged in running buffer (10 mM HEPES, 150 mM  
766 NaCl, 3 mM EDTA, 0.05% P20 surfactant, and 1% BSA) containing SARS2-38 Fab ranging  
767 from 1 to 1,000 nM, followed by a dissociation step in running buffer alone. The BLI signal was  
768 recorded and analyzed using BIAevaluation Software (Biacore).

769 **Cryo-EM sample preparation.** Data were collected on lacey carbon grids with or  
770 without ultra-thin carbon film. For standard lacey carbon grids (Ted Pella #01895-F), SARS-  
771 CoV-2 spike was prepared at 1 mg/mL in TBS (30mM Tris pH 8, 150mM NaCl). For lacey  
772 carbon grids with ultra-thin carbon film (Ted Pella #01824G), SARS-CoV-2 spike was prepared

773 at 0.2 mg/mL in TBS. Each sample was incubated for 15 min with 1 molar equivalent of SARS2-  
774 38 Fab fragments, applied to glow-discharged grids, then flash-frozen in liquid ethane using a  
775 Vitrobot Mark IV (ThermoFisher Scientific).

776 **Cryo-EM data collection.** Grids were loaded into a Cs-corrected FEI Titan Krios 300kV  
777 microscope equipped with a Falcon 4 direct electron detector. Images were collected at a  
778 nominal magnification of 59000x, resulting in a pixel size of 1.16Å. Each movie consisted of 50  
779 frames at 260ms each with a dose of 1e-/Å<sup>2</sup>/frame, yielding a total dose of 50e-/Å<sup>2</sup>/movie.

780 **Cryo-EM data processing.** Movies were motion corrected using MotionCor2 v1.3.1  
781 (Zheng et al., 2017), and contrast transfer function parameters were estimated using GCTF v1.18  
782 (Zhang, 2016). Particles were picked using a general model in CrYOLO v1.7.6 (Wagner et al.,  
783 2019). 2D classification was performed in Relion 3.1 (Scheres, 2012; Zivanov et al., 2018), and  
784 particles in good classes from grids with or without ultra-thin carbon were combined for further  
785 processing. These particles were subjected to 3D classification, and those from the best class (all  
786 RBDs in the down position, with one bound by Fab) were selected for iterative Bayesian  
787 polishing and per-particle CTF refinement in Relion 3.1 (Zivanov et al., 2019). These particles  
788 were then used in non-uniform refinement in cryoSPARC v3.1.0 to generate a full-spike map  
789 (Punjani et al., 2017). To improve map quality at the Fab/spike interface, a mask was generated  
790 encompassing only the Fv and RBD, and particles were subjected to local non-uniform  
791 refinement in cryoSPARC v3.1.0. Final maps were sharpened via deep learning employed  
792 through DeepEMhancer (Sanchez-Garcia et al., 2020).

793 **Model building.** The locally refined map was used to construct a model of the RBD  
794 bound by SARS2-38 Fv. An initial model for the RBD was adapted from a crystal structure of  
795 RBD bound to ACE2 (PDB 6M0J). For initial modeling of SARS2-38 Fv, pBLAST was used to

796 identify pre-existing Fab structures with high sequence similarity (PDB 1KIQ for VH, and PDB  
797 5XJM for VL). These starting components were combined and docked into the map, then refined  
798 in Coot v0.9.5 (Emsley et al., 2010), Isolde v1.1.0 (Croll, 2018), and Phenix v1.19 (Adams et al.,  
799 2010). Epitope and paratope contacts were identified using qtPISA (Krissinel and Henrick,  
800 2007), and structures were visualized using UCSF ChimeraX (Goddard et al., 2018).

801 The full-spike map was used to construct a model of the spike bound by one Fv with all  
802 RBDs in the down position. An initial model was generated by combining the locally refined  
803 Fv/RBD structure with a previously solved cryo-EM structure of trimeric SARS-CoV-2 spike in  
804 the proper RBD configuration (PDB 6VXX). This model was docked into the full-spike map  
805 then refined using Coot v0.9.5, Isolde v1.1.0, and Phenix v1.19.

806 **RBD conservation analysis.** RBD sequence data (residues 333-520) were retrieved on  
807 March 28, 2021 from the COVID-19 CoV Genetics Browser (covidcg.org), enabled by data from  
808 GISAID (Chen et al., 2021a; Shu and McCauley, 2017). In total, 786,273 sequences were  
809 included in the analysis. Probability of conservation relative to the reference sequence (2019n-  
810 CoV/WA1/2020) was computed for each residue, and results were log-transformed and  
811 normalized to generate a per-residue conservation score (1 = complete conservation, 0 = zero  
812 conservation). Results were visualized using a color-coded surface rendering of the RBD in  
813 UCSF ChimeraX.

814 **Neutralization assays.** FRNTs were performed as described (Case *et al.*, 2020). Briefly,  
815 serial dilutions of antibody were incubated with  $2 \times 10^2$  FFU of SARS-CoV-2 for 1 h at 37°C.  
816 Immune complexes were added to cell monolayers (Vero E6 cells or other cell lines where  
817 indicated) and incubated for 1 h at 37°C prior to the addition of 1% (w/v) methylcellulose in  
818 MEM. Following incubation for 30 h at 37°C, cells were fixed with 4% paraformaldehyde

819 (PFA), permeabilized and stained for infection foci with SARS2-16 (hybridoma supernatant  
820 diluted 1:6,000 to a final concentration of ~20 ng/mL) when using SARS-CoV-2 isolate  
821 WA1/2020, or with a mixture of mAbs that bind various epitopes on the RBD and NTD of spike  
822 (SARS2-02, SARS2-11, SARS2-31, SARS2-38, SARS2-57, and SARS2-71; diluted to 1 µg/mL  
823 total mAb concentration) for the VOCs. Antibody-dose response curves were analyzed using  
824 non-linear regression analysis (with a variable slope) (GraphPad Software). The antibody half-  
825 maximal inhibitory concentration (EC50) required to reduce infection was determined.

826 **Pre- and post-attachment neutralization assays.** For pre-attachment assays, serial  
827 dilutions of mAbs were prepared at 4°C in Dulbecco's modified Eagle medium (DMEM) with  
828 2% FBS and preincubated with 10<sup>2</sup> FFU of SARS-CoV-2 for 1 h at 4°C. MAb-virus complexes  
829 were added to a monolayer of Vero cells for 1 h at 4°C. Virus was allowed to internalize during a  
830 37°C incubation for 30 min. Cells were overlaid with 1% (wt/vol) methylcellulose in MEM. For  
831 post-attachment assays, 2 x 10<sup>2</sup> FFU of SARS-CoV-2 was adsorbed onto a monolayer of Vero  
832 cells for 1 h at 4°C. After removal of unbound virus, cells were washed twice with cold DMEM,  
833 followed by the addition of serial dilutions of MAbs in cold DMEM. Virus-adsorbed cells were  
834 incubated with mAb dilutions for 1 h at 4°C. Virus then was allowed to internalize for 30 min at  
835 37°C, and subsequently cells were overlaid with methylcellulose as described above. Thirty  
836 hours later, plates were fixed with 4% PFA and analyzed for antigen-specific foci as described  
837 above for FRNTs.

838 **Attachment inhibition assay.** SARS-COV-2 was incubated with mAbs at 10 µg/mL for  
839 1 h at 4°C. The mixture then was added to pre-chilled Vero E6, Vero-TMPRSS2, Vero-  
840 TMPRSS2-ACE2, or Calu-3 cells at an MOI of 0.005 and incubated at 4°C for 1 h. Cells were  
841 washed six times with chilled PBS before addition of lysis buffer and extraction of RNA using

842 MagMax viral RNA isolation kit (Thermo Fisher Scientific) and a Kingfisher Flex 96-well  
843 extraction machine (Thermo Fisher Scientific). SARS-CoV-2 RNA was quantified by qRT-PCR  
844 using the N-specific primer/probe set described below. *GAPDH* was measured using a  
845 predesigned primer/probe set (IDT PrimeTime Assay Hs.PT.39a.22214836). Viral RNA levels  
846 were normalized to *GAPDH*, and the fold change was compared with isotype control mAb. For  
847 each cell type, a control with a 4-fold lower MOI (0.00125) was included to demonstrate  
848 detection of decreased viral RNA levels.

849 **Virus internalization assay.** SARS-COV-2 was incubated with mAbs at 10 µg/mL for 1  
850 h at 4°C. The mixture was then added to pre-chilled Vero E6 cells at an MOI of 0.005 and  
851 incubated at 4°C for 1 h. Cells were washed twice with chilled PBS to remove unbound virus,  
852 and subsequently incubated in DMEM at 37°C for 30 min to allow virus internalization. Cells  
853 then were treated with proteinase K and RNaseA at 37°C for 10 min to removed uninternalized  
854 virus. Viral and cellular RNA were extracted and analyzed as described above for the attachment  
855 inhibition assay. A no internalization control was included, where proteinase K and RNase A  
856 treatments were performed directly after washing, without an internalization step.

857 **Measurement of viral burden and cytokine and chemokine levels.** On 7 dpi, mice  
858 were euthanized and organs were collected. Nasal washes were collected in 0.5 mL of PBS.  
859 Organs were weighed and homogenized using a MagNA Lyser (Roche). Viral RNA from  
860 homogenized organs or nasal wash was isolated using the MagMAX Viral RNA Isolation Kit  
861 (ThermoFisher) and measured by TaqMan one-step quantitative reverse-transcription PCR (RT-  
862 qPCR) on an ABI 7500 Fast Instrument. Viral burden is expressed on a log<sub>10</sub> scale as viral RNA  
863 per mg for each organ or total nasal wash after comparison with a standard curve produced using  
864 serial 10-fold dilutions of viral RNA standard. Primers were 5'-



865 ATGCTGCAATCGTGCTACAA-3', 5'- GACTGCCGCCTCTGCTC-3', and probe 5'-/56-FAM/  
866 TCAAGGAAC/Zen/ AACATTGCCAA/3IABkFQ-3' (Case *et al.*, 2020). For the measurement  
867 of cytokine and chemokine levels in the lung, lung homogenates were treated with 1% Triton X-  
868 100 for 1 h at room temperature to inactivate virus. Cytokine and chemokine levels in the lung  
869 homogenate were then analyzed by multiplex array (Eve Technologies Corporation).

870

### 871 **QUANTIFICATION AND STATISTICAL ANALYSIS**

872 Statistical significance was assigned when p values were < 0.05 using Prism version 8  
873 (GraphPad). Tests, number of animals (n), median values, and statistical comparison groups are  
874 indicated in the Figure legends.

875 **REFERENCES**

- 876
- 877 Adams, P.D., Afonine, P.V., Bunkóczi, G., Chen, V.B., Davis, I.W., Echols, N., Headd, J.J.,  
878 Hung, L.W., Kapral, G.J., Grosse-Kunstleve, R.W., et al. (2010). PHENIX: a comprehensive  
879 Python-based system for macromolecular structure solution. *Acta Crystallogr D Biol Crystallogr*  
880 *66*, 213-221. [10.1107/S0907444909052925](https://doi.org/10.1107/S0907444909052925).
- 881
- 882 Alsoussi, W.B., Turner, J.S., Case, J.B., Zhao, H., Schmitz, A.J., Zhou, J.Q., Chen, R.E., Lei, T.,  
883 Rizk, A.A., McIntire, K.M., et al. (2020). A Potently Neutralizing Antibody Protects Mice  
884 against SARS-CoV-2 Infection. *J Immunol* *205*, 915-922. [10.4049/jimmunol.2000583](https://doi.org/10.4049/jimmunol.2000583).
- 885
- 886 Baden, L.R., El Sahly, H.M., Essink, B., Kotloff, K., Frey, S., Novak, R., Diemert, D., Spector,  
887 S.A., Rouphael, N., Creech, C.B., et al. (2021). Efficacy and Safety of the mRNA-1273 SARS-  
888 CoV-2 Vaccine. *N Engl J Med* *384*, 403-416. [10.1056/NEJMoa2035389](https://doi.org/10.1056/NEJMoa2035389).
- 889
- 890 Barnes, C.O., Jette, C.A., Abernathy, M.E., Dam, K.A., Esswein, S.R., Gristick, H.B., Malyutin,  
891 A.G., Sharaf, N.G., Huey-Tubman, K.E., Lee, Y.E., et al. (2020). SARS-CoV-2 neutralizing  
892 antibody structures inform therapeutic strategies. *Nature* *588*, 682-687. [10.1038/s41586-020-](https://doi.org/10.1038/s41586-020-2852-1)  
893 [2852-1](https://doi.org/10.1038/s41586-020-2852-1).
- 894
- 895 Baum, A., Ajithdoss, D., Copin, R., Zhou, A., Lanza, K., Negron, N., Ni, M., Wei, Y.,  
896 Mohammadi, K., Musser, B., et al. (2020a). REGN-COV2 antibodies prevent and treat SARS-  
897 CoV-2 infection in rhesus macaques and hamsters. *Science* *370*, 1110-1115.  
898 [10.1126/science.abe2402](https://doi.org/10.1126/science.abe2402).
- 899
- 900 Baum, A., Fulton, B.O., Wloga, E., Copin, R., Pascal, K.E., Russo, V., Giordano, S., Lanza, K.,  
901 Negron, N., Ni, M., et al. (2020b). Antibody cocktail to SARS-CoV-2 spike protein prevents  
902 rapid mutational escape seen with individual antibodies. *Science* *369*, 1014-1018.  
903 [10.1126/science.abd0831](https://doi.org/10.1126/science.abd0831).
- 904
- 905 Cao, Y., Su, B., Guo, X., Sun, W., Deng, Y., Bao, L., Zhu, Q., Zhang, X., Zheng, Y., Geng, C.,  
906 et al. (2020). Potent Neutralizing Antibodies against SARS-CoV-2 Identified by High-  
907 Throughput Single-Cell Sequencing of Convalescent Patients' B Cells. *Cell* *182*, 73-84.e16.  
908 [10.1016/j.cell.2020.05.025](https://doi.org/10.1016/j.cell.2020.05.025).
- 909
- 910 Case, J.B., Bailey, A.L., Kim, A.S., Chen, R.E., and Diamond, M.S. (2020). Growth, detection,  
911 quantification, and inactivation of SARS-CoV-2. *Virology* *548*, 39-48.  
912 [10.1016/j.virol.2020.05.015](https://doi.org/10.1016/j.virol.2020.05.015).
- 913
- 914 Chen, A.T., Altschuler, K., Zhan, S.H., Chan, Y.A., and Deverman, B.E. (2021a). COVID-19  
915 CG enables SARS-CoV-2 mutation and lineage tracking by locations and dates of interest. *Elife*  
916 *10*. [10.7554/eLife.63409](https://doi.org/10.7554/eLife.63409).
- 917
- 918 Chen, P., Nirula, A., Heller, B., Gottlieb, R.L., Boscia, J., Morris, J., Huhn, G., Cardona, J.,  
919 Mocherla, B., Stosor, V., et al. (2021b). SARS-CoV-2 Neutralizing Antibody LY-CoV555 in  
920 Outpatients with Covid-19. *N Engl J Med* *384*, 229-237. [10.1056/NEJMoa2029849](https://doi.org/10.1056/NEJMoa2029849).

921  
922 Chen, R., Winkler, E., Case, J., Aziati, I., Bricker, T., Joshi, A., Darling, T., Ying, B., Errico, J.,  
923 Shrihari, S., et al. (2021c). In vivo monoclonal antibody efficacy against SARS-CoV-2 variant  
924 strains. Research Square (Preprint).  
925  
926 Chen, R.E., Zhang, X., Case, J.B., Winkler, E.S., Liu, Y., VanBlargan, L.A., Liu, J., Errico, J.M.,  
927 Xie, X., Suryadevara, N., et al. (2021d). Resistance of SARS-CoV-2 variants to neutralization by  
928 monoclonal and serum-derived polyclonal antibodies. *Nat Med*. 10.1038/s41591-021-01294-w.  
929  
930 Chi, X., Yan, R., Zhang, J., Zhang, G., Zhang, Y., Hao, M., Zhang, Z., Fan, P., Dong, Y., Yang,  
931 Y., et al. (2020). A neutralizing human antibody binds to the N-terminal domain of the Spike  
932 protein of SARS-CoV-2. *Science* 369, 650-655. 10.1126/science.abc6952.  
933  
934 Chu, H., Hu, B., Huang, X., Chai, Y., Zhou, D., Wang, Y., Shuai, H., Yang, D., Hou, Y., Zhang,  
935 X., et al. (2021). Host and viral determinants for efficient SARS-CoV-2 infection of the human  
936 lung. *Nat Commun* 12, 134. 10.1038/s41467-020-20457-w.  
937  
938 Clausen, T.M., Sandoval, D.R., Spliid, C.B., Pihl, J., Perrett, H.R., Painter, C.D., Narayanan, A.,  
939 Majowicz, S.A., Kwong, E.M., McVicar, R.N., et al. (2020). SARS-CoV-2 Infection Depends on  
940 Cellular Heparan Sulfate and ACE2. *Cell* 183, 1043-1057.e1015. 10.1016/j.cell.2020.09.033.  
941  
942 Croll, T.I. (2018). ISOLDE: a physically realistic environment for model building into low-  
943 resolution electron-density maps. *Acta Crystallogr D Struct Biol* 74, 519-530.  
944 10.1107/S2059798318002425.  
945  
946 Dejarnac, O., Hafirassou, M.L., Chazal, M., Versapuech, M., Gaillard, J., Perera-Lecoin, M.,  
947 Umana-Diaz, C., Bonnet-Madin, L., Carnec, X., Tinevez, J.Y., et al. (2018). TIM-  
948 1 Ubiquitination Mediates Dengue Virus Entry. *Cell Rep* 23, 1779-1793.  
949 10.1016/j.celrep.2018.04.013.  
950  
951 Dekkers, G., Bentlage, A.E.H., Stegmann, T.C., Howie, H.L., Lissenberg-Thunnissen, S.,  
952 Zimring, J., Rispens, T., and Vidarsson, G. (2017). Affinity of human IgG subclasses to mouse  
953 Fc gamma receptors. *MAbs* 9, 767-773. 10.1080/19420862.2017.1323159.  
954  
955 Dong, J., Zost, S.J., Greaney, A.J., Starr, T.N., Dingens, A.S., Chen, E.C., Chen, R.E., Case, J.B.,  
956 Sutton, R.E., Gilchuk, P., et al. (2021). Genetic and structural basis for recognition of SARS-  
957 CoV-2 spike protein by a two-antibody cocktail. bioRxiv. 10.1101/2021.01.27.428529.  
958  
959 Earnest, J.T., Holmes, A.C., Basore, K., Mack, M., Fremont, D.H., and Diamond, M.S. (2021).  
960 The mechanistic basis of protection by non-neutralizing anti-alphavirus antibodies. *Cell Rep* 35,  
961 108962. 10.1016/j.celrep.2021.108962.  
962  
963 Emsley, P., Lohkamp, B., Scott, W.G., and Cowtan, K. (2010). Features and development of  
964 Coot. *Acta Crystallogr D Biol Crystallogr* 66, 486-501. 10.1107/S0907444910007493.  
965

966 Fagre, A.C., Manhard, J., Adams, R., Eckley, M., Zhan, S., Lewis, J., Rocha, S.M., Woods, C.,  
967 Kuo, K., Liao, W., et al. (2020). A Potent SARS-CoV-2 Neutralizing Human Monoclonal  
968 Antibody That Reduces Viral Burden and Disease Severity in Syrian Hamsters. *Front Immunol*  
969 *11*, 614256. 10.3389/fimmu.2020.614256.  
970  
971 Goddard, T.D., Huang, C.C., Meng, E.C., Pettersen, E.F., Couch, G.S., Morris, J.H., and Ferrin,  
972 T.E. (2018). UCSF ChimeraX: Meeting modern challenges in visualization and analysis. *Protein*  
973 *Sci* 27, 14-25. 10.1002/pro.3235.  
974  
975 Golden, J.W., Cline, C.R., Zeng, X., Garrison, A.R., Carey, B.D., Mucker, E.M., White, L.E.,  
976 Shamblin, J.D., Brocato, R.L., Liu, J., et al. (2020). Human angiotensin-converting enzyme 2  
977 transgenic mice infected with SARS-CoV-2 develop severe and fatal respiratory disease. *JCI*  
978 *Insight* 5. 10.1172/jci.insight.142032.  
979  
980 Greaney, A.J., Loes, A.N., Crawford, K.H.D., Starr, T.N., Malone, K.D., Chu, H.Y., and Bloom,  
981 J.D. (2021). Comprehensive mapping of mutations in the SARS-CoV-2 receptor-binding domain  
982 that affect recognition by polyclonal human plasma antibodies. *Cell Host Microbe* 29, 463-  
983 476.e466. 10.1016/j.chom.2021.02.003.  
984  
985 Hansen, J., Baum, A., Pascal, K.E., Russo, V., Giordano, S., Wloga, E., Fulton, B.O., Yan, Y.,  
986 Koon, K., Patel, K., et al. (2020). Studies in humanized mice and convalescent humans yield a  
987 SARS-CoV-2 antibody cocktail. *Science* 369, 1010-1014. 10.1126/science.abd0827.  
988  
989 Hassan, A.O., Case, J.B., Winkler, E.S., Thackray, L.B., Kafai, N.M., Bailey, A.L., McCune,  
990 B.T., Fox, J.M., Chen, R.E., Alsoussi, W.B., et al. (2020). A SARS-CoV-2 Infection Model in  
991 Mice Demonstrates Protection by Neutralizing Antibodies. *Cell* 182, 744-753.e744.  
992 10.1016/j.cell.2020.06.011.  
993  
994 Hoffmann, M., Kleine-Weber, H., Schroeder, S., Krüger, N., Herrler, T., Erichsen, S.,  
995 Schiergens, T.S., Herrler, G., Wu, N.H., Nitsche, A., et al. (2020). SARS-CoV-2 Cell Entry  
996 Depends on ACE2 and TMPRSS2 and Is Blocked by a Clinically Proven Protease Inhibitor. *Cell*  
997 *181*, 271-280.e278. 10.1016/j.cell.2020.02.052.  
998  
999 Hsieh, C.L., Goldsmith, J.A., Schaub, J.M., DiVenere, A.M., Kuo, H.C., Javanmardi, K., Le,  
1000 K.C., Wrapp, D., Lee, A.G., Liu, Y., et al. (2020). Structure-based design of prefusion-stabilized  
1001 SARS-CoV-2 spikes. *Science* 369, 1501-1505. 10.1126/science.abd0826.  
1002  
1003 Kreye, J., Reincke, S.M., Kornau, H.C., Sánchez-Sendin, E., Corman, V.M., Liu, H., Yuan, M.,  
1004 Wu, N.C., Zhu, X., Lee, C.D., et al. (2020). A Therapeutic Non-self-reactive SARS-CoV-2  
1005 Antibody Protects from Lung Pathology in a COVID-19 Hamster Model. *Cell* 183, 1058-  
1006 1069.e1019. 10.1016/j.cell.2020.09.049.  
1007  
1008 Krissinel, E., and Henrick, K. (2007). Inference of macromolecular assemblies from crystalline  
1009 state. *J Mol Biol* 372, 774-797. 10.1016/j.jmb.2007.05.022.  
1010

- 1011 Lan, J., Ge, J., Yu, J., Shan, S., Zhou, H., Fan, S., Zhang, Q., Shi, X., Wang, Q., Zhang, L., and  
1012 Wang, X. (2020). Structure of the SARS-CoV-2 spike receptor-binding domain bound to the  
1013 ACE2 receptor. *Nature* 581, 215-220. 10.1038/s41586-020-2180-5.  
1014
- 1015 Li, T., Han, X., Gu, C., Guo, H., Zhang, H., Wang, Y., Hu, C., Wang, K., Liu, F., Luo, F., et al.  
1016 (2021). Ultrapotent SARS-CoV-2 neutralizing antibodies with protective efficacy against newly  
1017 emerged mutational variants. bioRxiv, 2021.2004.2019.440481. 10.1101/2021.04.19.440481.  
1018
- 1019 Liu, L., Wang, P., Nair, M.S., Yu, J., Rapp, M., Wang, Q., Luo, Y., Chan, J.F., Sahi, V.,  
1020 Figueroa, A., et al. (2020). Potent neutralizing antibodies against multiple epitopes on SARS-  
1021 CoV-2 spike. *Nature* 584, 450-456. 10.1038/s41586-020-2571-7.  
1022
- 1023 Liu, Z., VanBlargan, L.A., Bloyet, L.M., Rothlauf, P.W., Chen, R.E., Stumpf, S., Zhao, H.,  
1024 Errico, J.M., Theel, E.S., Liebeskind, M.J., et al. (2021). Identification of SARS-CoV-2 spike  
1025 mutations that attenuate monoclonal and serum antibody neutralization. *Cell Host Microbe* 29,  
1026 477-488.e474. 10.1016/j.chom.2021.01.014.  
1027
- 1028 Oladunni, F.S., Park, J.G., Pino, P.A., Gonzalez, O., Akhter, A., Allué-Guardia, A., Olmo-  
1029 Fontánez, A., Gautam, S., Garcia-Vilanova, A., Ye, C., et al. (2020). Lethality of SARS-CoV-2  
1030 infection in K18 human angiotensin-converting enzyme 2 transgenic mice. *Nat Commun* 11,  
1031 6122. 10.1038/s41467-020-19891-7.  
1032
- 1033 Pinto, D., Park, Y.J., Beltramello, M., Walls, A.C., Tortorici, M.A., Bianchi, S., Jaconi, S.,  
1034 Culap, K., Zatta, F., De Marco, A., et al. (2020). Cross-neutralization of SARS-CoV-2 by a  
1035 human monoclonal SARS-CoV antibody. *Nature* 583, 290-295. 10.1038/s41586-020-2349-y.  
1036
- 1037 Plante, J.A., Mitchell, B.M., Plante, K.S., Debbink, K., Weaver, S.C., and Menachery, V.D.  
1038 (2021). The variant gambit: COVID-19's next move. *Cell Host Microbe*.  
1039 10.1016/j.chom.2021.02.020.  
1040
- 1041 Polack, F.P., Thomas, S.J., Kitchin, N., Absalon, J., Gurtman, A., Lockhart, S., Perez, J.L., Pérez  
1042 Marc, G., Moreira, E.D., Zerbini, C., et al. (2020). Safety and Efficacy of the BNT162b2 mRNA  
1043 Covid-19 Vaccine. *N Engl J Med* 383, 2603-2615. 10.1056/NEJMoa2034577.  
1044
- 1045 Punjani, A., Rubinstein, J.L., Fleet, D.J., and Brubaker, M.A. (2017). cryoSPARC: algorithms  
1046 for rapid unsupervised cryo-EM structure determination. *Nat Methods* 14, 290-296.  
1047 10.1038/nmeth.4169.  
1048
- 1049 Rogers, T.F., Zhao, F., Huang, D., Beutler, N., Burns, A., He, W.T., Limbo, O., Smith, C., Song,  
1050 G., Woehl, J., et al. (2020). Isolation of potent SARS-CoV-2 neutralizing antibodies and  
1051 protection from disease in a small animal model. *Science* 369, 956-963.  
1052 10.1126/science.abc7520.  
1053
- 1054 Sadoff, J., Le Gars, M., Shukarev, G., Heerwegh, D., Truyers, C., de Groot, A.M., Stoop, J.,  
1055 Tete, S., Van Damme, W., Leroux-Roels, I., et al. (2021). Interim Results of a Phase 1-2a Trial  
1056 of Ad26.COV2.S Covid-19 Vaccine. *N Engl J Med*. 10.1056/NEJMoa2034201.

1057  
1058 Sanchez-Garcia, R., Gomez-Blanco, J.V.O.P.J., Profile, V.O., Cuervo, A., ORCID Profile  
1059 Carazo, J.V.O.P., Sorzano, C., and View ORCID Profile Vargas, J. (2020). DeepEMhancer: a  
1060 deep learning solution for cryo-EM volume post-processing. *bioRxiv*.  
1061  
1062 Scheres, S.H. (2012). A Bayesian view on cryo-EM structure determination. *J Mol Biol* *415*,  
1063 406-418. [10.1016/j.jmb.2011.11.010](https://doi.org/10.1016/j.jmb.2011.11.010).  
1064  
1065 Schmitz, A.J., Turner, J.S., Liu, Z., Aziati, I.D., Chen, R.E., Joshi, A., Bricker, T.L., Darling,  
1066 T.L., Adelsberg, D.C., Alsoussi, W.B., et al. (2021). A public vaccine-induced human antibody  
1067 protects against SARS-CoV-2 and emerging variants. *bioRxiv*. [10.1101/2021.03.24.436864](https://doi.org/10.1101/2021.03.24.436864).  
1068  
1069 Shen, X., Tang, H., Pajon, R., Smith, G., Glenn, G.M., Shi, W., Korber, B., and Montefiori, D.C.  
1070 (2021). Neutralization of SARS-CoV-2 Variants B.1.429 and B.1.351. *N Engl J Med*.  
1071 [10.1056/NEJMc2103740](https://doi.org/10.1056/NEJMc2103740).  
1072  
1073 Shi, R., Shan, C., Duan, X., Chen, Z., Liu, P., Song, J., Song, T., Bi, X., Han, C., Wu, L., et al.  
1074 (2020). A human neutralizing antibody targets the receptor-binding site of SARS-CoV-2. *Nature*  
1075 *584*, 120-124. [10.1038/s41586-020-2381-y](https://doi.org/10.1038/s41586-020-2381-y).  
1076  
1077 Shu, Y., and McCauley, J. (2017). GISAID: Global initiative on sharing all influenza data - from  
1078 vision to reality. *Euro Surveill* *22*. [10.2807/1560-7917.ES.2017.22.13.30494](https://doi.org/10.2807/1560-7917.ES.2017.22.13.30494).  
1079  
1080 Starr, T.N., Greaney, A.J., Dingens, A.S., and Bloom, J.D. (2021). Complete map of SARS-  
1081 CoV-2 RBD mutations that escape the monoclonal antibody LY-CoV555 and its cocktail with  
1082 LY-CoV016. *Cell Rep Med*, 100255. [10.1016/j.xcrm.2021.100255](https://doi.org/10.1016/j.xcrm.2021.100255).  
1083  
1084 Suryadevara, N., Shrihari, S., Gilchuk, P., VanBlargan, L.A., Binshtein, E., Zost, S.J., Nargi,  
1085 R.S., Sutton, R.E., Winkler, E.S., Chen, E.C., et al. (2021). Neutralizing and protective human  
1086 monoclonal antibodies recognizing the N-terminal domain of the SARS-CoV-2 spike protein.  
1087 *Cell*. [10.1016/j.cell.2021.03.029](https://doi.org/10.1016/j.cell.2021.03.029).  
1088  
1089 ter Meulen, J., van den Brink, E.N., Poon, L.L., Marissen, W.E., Leung, C.S., Cox, F., Cheung,  
1090 C.Y., Bakker, A.Q., Bogaards, J.A., van Deventer, E., et al. (2006). Human monoclonal antibody  
1091 combination against SARS coronavirus: synergy and coverage of escape mutants. *PLoS Med* *3*,  
1092 e237. [10.1371/journal.pmed.0030237](https://doi.org/10.1371/journal.pmed.0030237).  
1093  
1094 Thomson, E.C., Rosen, L.E., Shepherd, J.G., Spreafico, R., da Silva Filipe, A., Wojcechowskyj,  
1095 J.A., Davis, C., Piccoli, L., Pascall, D.J., Dillen, J., et al. (2021). Circulating SARS-CoV-2 spike  
1096 N439K variants maintain fitness while evading antibody-mediated immunity. *Cell* *184*, 1171-  
1097 1187.e1120. [10.1016/j.cell.2021.01.037](https://doi.org/10.1016/j.cell.2021.01.037).  
1098  
1099 Tortorici, M.A., Beltramello, M., Lempp, F.A., Pinto, D., Dang, H.V., Rosen, L.E., McCallum,  
1100 M., Bowen, J., Minola, A., Jaconi, S., et al. (2020). Ultrapotent human antibodies protect against  
1101 SARS-CoV-2 challenge via multiple mechanisms. *Science* *370*, 950-957.  
1102 [10.1126/science.abe3354](https://doi.org/10.1126/science.abe3354).

1103  
1104 Tortorici, M.A., Czudnochowski, N., Starr, T.N., Marzi, R., Walls, A.C., Zatta, F., Bowen, J.E.,  
1105 Jaconi, S., Iulio, J.D., Wang, Z., et al. (2021). Structural basis for broad sarbecovirus  
1106 neutralization by a human monoclonal antibody. *bioRxiv*. 10.1101/2021.04.07.438818.  
1107  
1108 Viruses, C.S.G.o.t.I.C.o.T.o. (2020). The species Severe acute respiratory syndrome-related  
1109 coronavirus: classifying 2019-nCoV and naming it SARS-CoV-2. *Nat Microbiol* 5, 536-544.  
1110 10.1038/s41564-020-0695-z.  
1111  
1112 Voysey, M., Clemens, S.A.C., Madhi, S.A., Weckx, L.Y., Folegatti, P.M., Aley, P.K., Angus, B.,  
1113 Baillie, V.L., Barnabas, S.L., Bhorat, Q.E., et al. (2021). Safety and efficacy of the ChAdOx1  
1114 nCoV-19 vaccine (AZD1222) against SARS-CoV-2: an interim analysis of four randomised  
1115 controlled trials in Brazil, South Africa, and the UK. *Lancet* 397, 99-111. 10.1016/S0140-  
1116 6736(20)32661-1.  
1117  
1118 Wagner, T., Merino, F., Stabrin, M., Moriya, T., Antoni, C., Apelbaum, A., Hagel, P., Sitsel, O.,  
1119 Raisch, T., Prumbaum, D., et al. (2019). SPHIRE-crYOLO is a fast and accurate fully automated  
1120 particle picker for cryo-EM. *Commun Biol* 2, 218. 10.1038/s42003-019-0437-z.  
1121  
1122 Wang, P., Nair, M.S., Liu, L., Iketani, S., Luo, Y., Guo, Y., Wang, M., Yu, J., Zhang, B.,  
1123 Kwong, P.D., et al. (2021). Antibody resistance of SARS-CoV-2 variants B.1.351 and B.1.1.7.  
1124 *Nature*. 10.1038/s41586-021-03398-2.  
1125  
1126 Weinreich, D.M., Sivapalasingam, S., Norton, T., Ali, S., Gao, H., Bhore, R., Musser, B.J., Soo,  
1127 Y., Rofail, D., Im, J., et al. (2021). REGN-COV2, a Neutralizing Antibody Cocktail, in  
1128 Outpatients with Covid-19. *N Engl J Med* 384, 238-251. 10.1056/NEJMoa2035002.  
1129  
1130 Weisblum, Y., Schmidt, F., Zhang, F., DaSilva, J., Poston, D., Lorenzi, J.C., Muecksch, F.,  
1131 Rutkowska, M., Hoffmann, H.H., Michailidis, E., et al. (2020). Escape from neutralizing  
1132 antibodies by SARS-CoV-2 spike protein variants. *Elife* 9. 10.7554/eLife.61312.  
1133  
1134 Winkler, E.S., Bailey, A.L., Kafai, N.M., Nair, S., McCune, B.T., Yu, J., Fox, J.M., Chen, R.E.,  
1135 Earnest, J.T., Keeler, S.P., et al. (2020). SARS-CoV-2 infection of human ACE2-transgenic mice  
1136 causes severe lung inflammation and impaired function. *Nat Immunol* 21, 1327-1335.  
1137 10.1038/s41590-020-0778-2.  
1138  
1139 Winkler, E.S., Gilchuk, P., Yu, J., Bailey, A.L., Chen, R.E., Chong, Z., Zost, S.J., Jang, H.,  
1140 Huang, Y., Allen, J.D., et al. (2021). Human neutralizing antibodies against SARS-CoV-2  
1141 require intact Fc effector functions for optimal therapeutic protection. *Cell* 184, 1804-  
1142 1820.e1816. 10.1016/j.cell.2021.02.026.  
1143  
1144 Yinda, C.K., Port, J.R., Bushmaker, T., Offei Owusu, I., Purushotham, J.N., Avanzato, V.A.,  
1145 Fischer, R.J., Schulz, J.E., Holbrook, M.G., Hebner, M.J., et al. (2021). K18-hACE2 mice  
1146 develop respiratory disease resembling severe COVID-19. *PLoS Pathog* 17, e1009195.  
1147 10.1371/journal.ppat.1009195.  
1148

- 1149 Yuan, M., Wu, N.C., Zhu, X., Lee, C.D., So, R.T.Y., Lv, H., Mok, C.K.P., and Wilson, I.A.  
1150 (2020). A highly conserved cryptic epitope in the receptor binding domains of SARS-CoV-2 and  
1151 SARS-CoV. *Science* 368, 630-633. 10.1126/science.abb7269.  
1152
- 1153 Zhang, K. (2016). Gctf: Real-time CTF determination and correction. *J Struct Biol* 193, 1-12.  
1154 10.1016/j.jsb.2015.11.003.  
1155
- 1156 Zheng, S.Q., Palovcak, E., Armache, J.P., Verba, K.A., Cheng, Y., and Agard, D.A. (2017).  
1157 MotionCor2: anisotropic correction of beam-induced motion for improved cryo-electron  
1158 microscopy. *Nat Methods* 14, 331-332. 10.1038/nmeth.4193.  
1159
- 1160 Zivanov, J., Nakane, T., Forsberg, B.O., Kimanius, D., Hagen, W.J., Lindahl, E., and Scheres,  
1161 S.H. (2018). New tools for automated high-resolution cryo-EM structure determination in  
1162 RELION-3. *Elife* 7. 10.7554/eLife.42166.  
1163
- 1164 Zivanov, J., Nakane, T., and Scheres, S.H.W. (2019). A Bayesian approach to beam-induced  
1165 motion correction in cryo-EM single-particle analysis. *IUCrJ* 6, 5-17.  
1166 10.1107/S205225251801463X.  
1167
- 1168 Zost, S.J., Gilchuk, P., Case, J.B., Binshtein, E., Chen, R.E., Nkolola, J.P., Schäfer, A., Reidy,  
1169 J.X., Trivette, A., Nargi, R.S., et al. (2020). Potently neutralizing and protective human  
1170 antibodies against SARS-CoV-2. *Nature* 584, 443-449. 10.1038/s41586-020-2548-6.  
1171



| Competition group | mAb      | Istoype | Final Boost | % reference mAb binding inhibition |           |        | % ACE2 inhibition | Neutralization |                    | Cross-reactivity (OD450) |            |
|-------------------|----------|---------|-------------|------------------------------------|-----------|--------|-------------------|----------------|--------------------|--------------------------|------------|
|                   |          |         |             | COV2-2130                          | COV2-2196 | CR3022 |                   | EC50 (ng/mL)   | Percent inhibition | SARS-CoV-2               | SARS-CoV-1 |
| A                 | SARS2-71 | G1      | spike       | 2                                  | 99        | 8      | 100               | 9              | 100                | 1.7                      | 0.0        |
|                   | SARS2-58 | G1      | spike       | 1                                  | 97        | 13     | 100               | 9              | 100                | 1.7                      | 0.1        |
|                   | SARS2-19 | G1      | spike       | 1                                  | 99        | 14     | 100               | 15             | 100                | 1.6                      | 0.0        |
|                   | SARS2-34 | G1      | spike       | 4                                  | 95        | 1      | 100               | 19             | 100                | 1.7                      | 0.0        |
|                   | SARS2-16 | G1      | spike       | 2                                  | 100       | 11     | 100               | 33             | 100                | 1.7                      | 0.0        |
|                   | SARS2-07 | G1      | RBD         | 4                                  | 98        | 14     | 100               | 61             | 100                | 1.5                      | 0.0        |
|                   | SARS2-23 | G1      | spike       | 11                                 | 54        | 16     | 99                | 89             | 99                 | 1.4                      | 0.0        |
|                   | SARS2-21 | A       | RBD         | 4                                  | 96        | 24     | 100               | 19             | 99                 | 0.9                      | 0.0        |
| B                 | SARS2-32 | G1      | RBD         | 100                                | 97        | 10     | 100               | 10             | 100                | 1.5                      | 0.0        |
|                   | SARS2-55 | G1      | RBD         | 99                                 | 99        | 13     | 100               | 7              | 100                | 1.7                      | 0.0        |
|                   | SARS2-02 | G1      | RBD         | 100                                | 100       | 14     | 100               | 7              | 100                | 1.3                      | 0.0        |
|                   | SARS2-66 | G1      | spike       | 70                                 | 60        | 9      | 99                | 15             | 100                | 1.4                      | 0.0        |
| C                 | SARS2-38 | G1      | spike       | 95                                 | 1         | 12     | 99                | 9              | 100                | 1.4                      | 0.0        |
|                   | SARS2-22 | G1      | spike       | 91                                 | -1        | 9      | 99                | 7              | 100                | 1.5                      | 0.0        |
|                   | SARS2-01 | G1      | RBD         | 95                                 | 2         | 17     | 99                | 65             | 99                 | 1.1                      | 0.0        |
|                   | SARS2-53 | G1      | spike       | 91                                 | 0         | 27     | 17                | 41             | 89                 | 1.5                      | 0.4        |
|                   | SARS2-48 | G1      | RBD         | 67                                 | 6         | 11     | 40                | 275            | 78                 | 1.5                      | 0.0        |
|                   | SARS2-25 | G1      | spike       | 99                                 | 0         | 16     | 4                 | 123            | 90                 | 1.7                      | 0.0        |
|                   | SARS2-15 | G1      | spike       | 90                                 | 1         | 24     | 18                | 403            | 82                 | 1.4                      | 0.1        |
|                   | SARS2-18 | G1      | spike       | 99                                 | 2         | 22     | 3                 | 309            | 90                 | 1.6                      | 0.1        |
| D                 | SARS2-31 | G1      | spike       | 1                                  | -1        | 98     | 100               | 21             | 100                | 1.4                      | 1.5        |
|                   | SARS2-54 | G1      | spike       | 0                                  | -1        | 91     | 82                | 32             | 92                 | 1.5                      | 0.0        |
|                   | SARS2-08 | G1      | RBD         | 0                                  | -2        | 100    | 100               | 774            | 76                 | 1.3                      | 1.5        |
|                   | SARS2-44 | G1      | RBD         | -2                                 | -5        | 88     | 98                | 258            | 91                 | 1.6                      | 1.0        |
|                   | SARS2-05 | G1      | RBD         | -1                                 | -3        | 90     | 98                | 260            | 85                 | 1.2                      | 0.9        |
|                   | SARS2-61 | G1      | RBD         | 3                                  | 32        | 83     | 96                | 350            | 81                 | 1.2                      | 0.0        |
|                   | SARS2-06 | G1      | RBD         | 2                                  | 4         | 93     | 83                | 1389           | 81                 | 1.2                      | 0.0        |
|                   | SARS2-10 | G1      | RBD         | 1                                  | 5         | 97     | 100               | 528            | 100                | 1.2                      | 1.6        |
|                   | SARS2-42 | G1      | RBD         | 0                                  | -1        | 90     | 56                | 271            | 82                 | 1.6                      | 1.5        |
|                   | SARS2-39 | G1      | spike       | 3                                  | -1        | 46     | 9                 | 284            | 94                 | 1.6                      | 0.6        |
|                   | SARS2-03 | G1      | RBD         | 5                                  | -2        | 68     | 4                 | 25             | 97                 | 1.3                      | 0.5        |
|                   | SARS2-65 | G1      | spike       | -1                                 | 1         | 96     | 3                 | 145            | 87                 | 1.7                      | 1.5        |
|                   | SARS2-70 | G1      | RBD         | 5                                  | -2        | 58     | 4                 | 98             | 93                 | 1.9                      | 0.4        |
|                   | SARS2-62 | G1      | RBD         | 1                                  | -1        | 99     | 6                 | 471            | 72                 | 1.4                      | 1.0        |
|                   | SARS2-14 | G1      | spike       | 1                                  | 1         | 97     | 8                 | 165            | 79                 | 1.5                      | 1.9        |
|                   | SARS2-09 | G1      | RBD         | 12                                 | 0         | 67     | 6                 | 529            | 96                 | 1.4                      | 1.1        |
|                   | SARS2-49 | G1      | RBD         | 5                                  | 0         | 68     | 8                 | 1100           | 87                 | 1.8                      | 1.0        |
|                   | SARS2-27 | G1      | spike       | 8                                  | 7         | 96     | 17                | N/A            | 45                 | 1.4                      | 1.6        |
| SARS2-04          | G1       | RBD     | 1           | -2                                 | 89        | 0      | 6939              | 49             | 1.3                | 0.7                      |            |
| SARS2-41          | G1       | spike   | 6           | -1                                 | 58        | 11     | 2425              | 64             | 1.6                | 1.5                      |            |
| E                 | SARS2-67 | G1      | RBD         | 3                                  | -1        | 22     | 5                 | 321            | 80                 | 1.8                      | 1.5        |
|                   | SARS2-37 | G1      | RBD         | 37                                 | 2         | 4      | 35                | 351            | 76                 | 1.3                      | 0.0        |
|                   | SARS2-52 | G1      | RBD         | 11                                 | 8         | 9      | 3                 | N/A            | 4                  | 0.6                      | 0.0        |

**Figure 1**

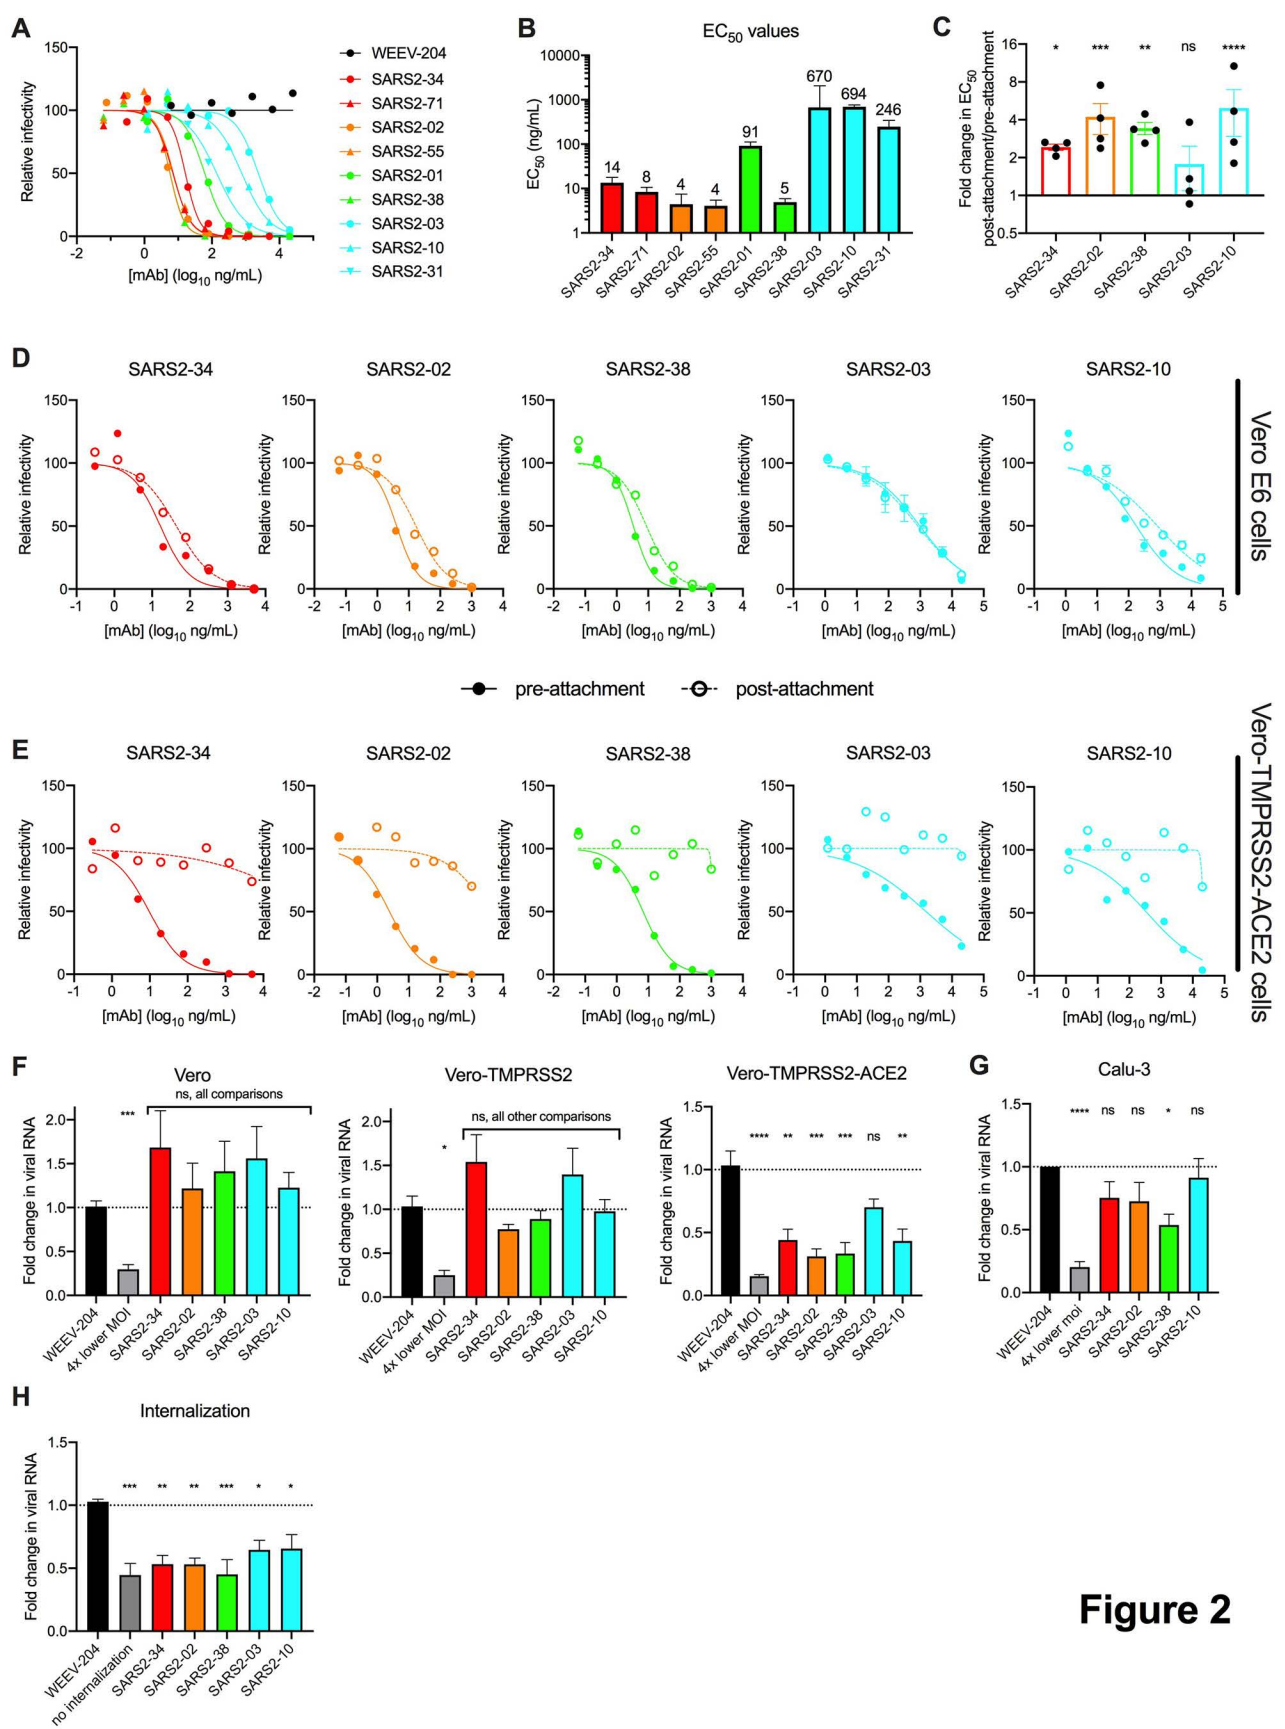

**A**

| Group | mAb      | Residue number of mutation conferring resistance |     |     |     |     |     |     |     |     |     |     |     |     |     |     |     |     |     |     |     |     |     |     |     |     |  |
|-------|----------|--------------------------------------------------|-----|-----|-----|-----|-----|-----|-----|-----|-----|-----|-----|-----|-----|-----|-----|-----|-----|-----|-----|-----|-----|-----|-----|-----|--|
|       |          | 345                                              | 346 | 352 | 378 | 408 | 441 | 444 | 446 | 450 | 452 | 458 | 474 | 476 | 477 | 478 | 479 | 483 | 484 | 486 | 486 | 490 | 494 | 499 | 504 | 542 |  |
| A     | SARS2-34 |                                                  |     |     |     |     |     |     |     |     |     |     | +   | +   | +   | +   | +   |     |     | +   |     |     |     | +   |     |     |  |
|       | SARS2-71 |                                                  |     |     |     |     |     |     |     |     |     |     |     | +   | +   | +   | +   |     |     | +   |     |     |     |     | +   |     |  |
| B     | SARS2-02 |                                                  |     |     |     |     |     |     | +   |     | +   |     |     |     |     |     |     |     | +   |     |     |     |     |     |     |     |  |
|       | SARS2-55 |                                                  |     |     |     |     |     |     | +   |     | +   |     |     |     |     |     |     |     | +   |     |     |     |     |     |     |     |  |
| C     | SARS2-1  |                                                  | +   | +   |     |     |     |     |     | +   | +   | +   |     |     |     |     |     |     |     |     |     |     |     | +   |     |     |  |
|       | SARS2-38 |                                                  |     |     |     |     |     |     |     | +   | +   |     |     |     |     |     |     |     |     |     |     |     |     |     |     |     |  |
| D     | SARS2-31 |                                                  |     |     |     | +   | +   |     |     |     |     |     |     |     |     |     |     |     |     |     |     |     |     |     |     | +   |  |

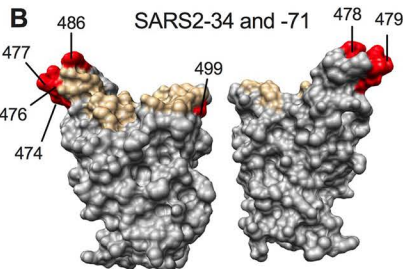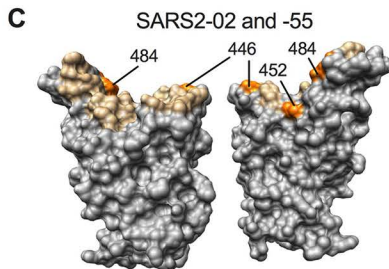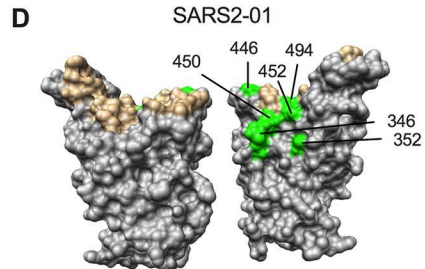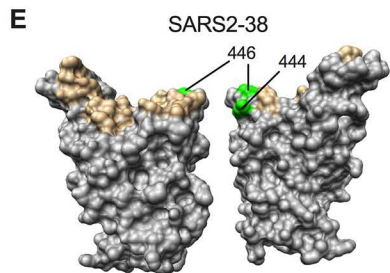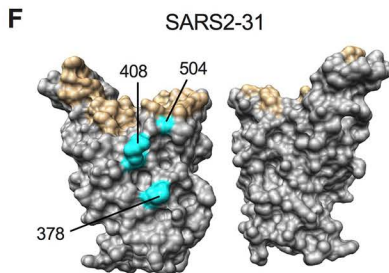**Figure 3**

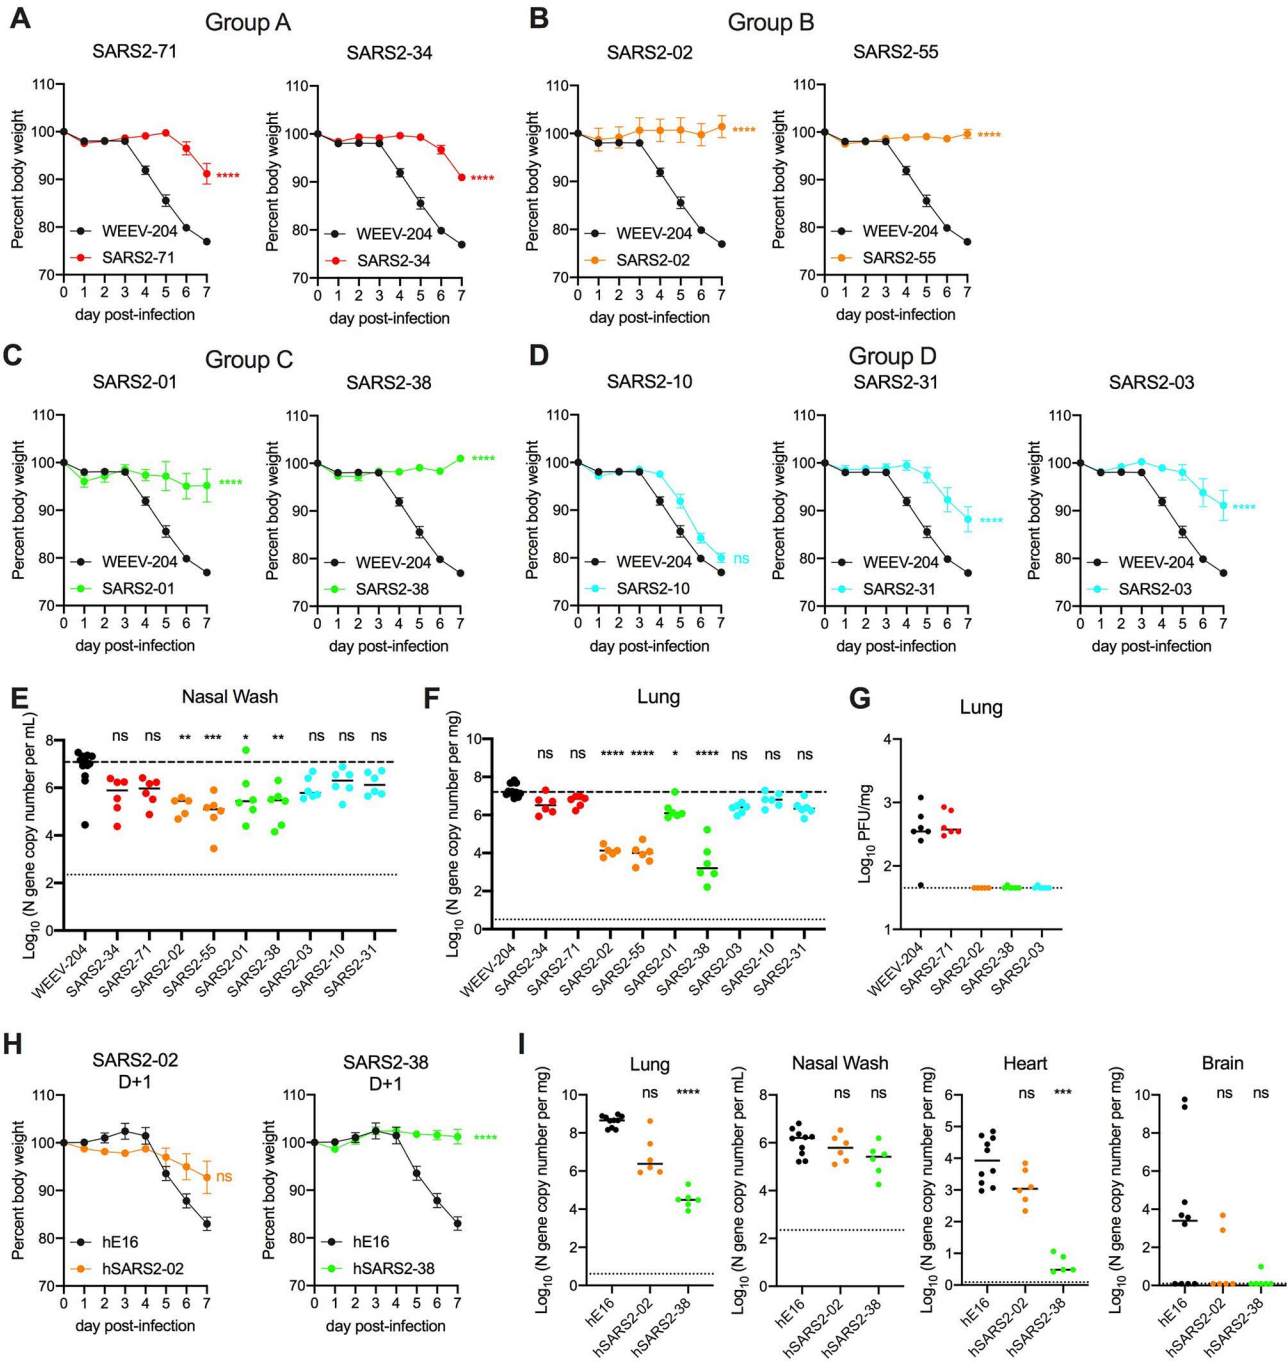

**Figure 4**

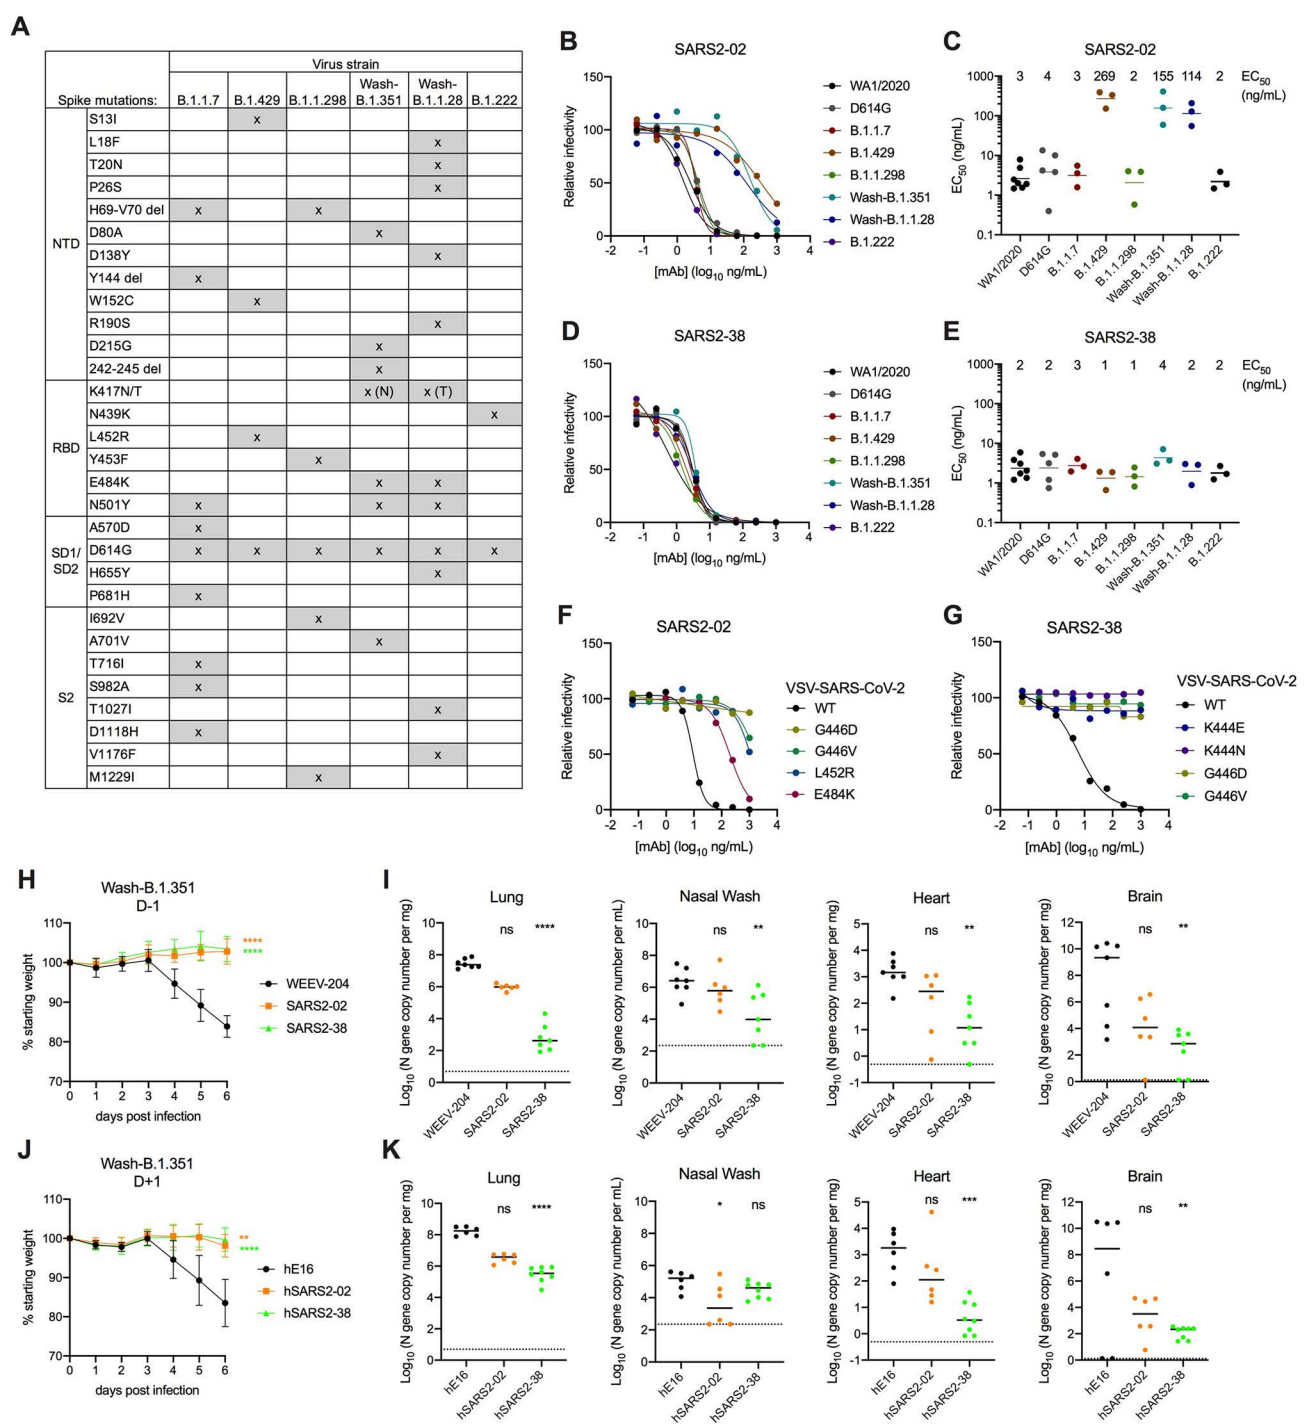

**Figure 5**



A

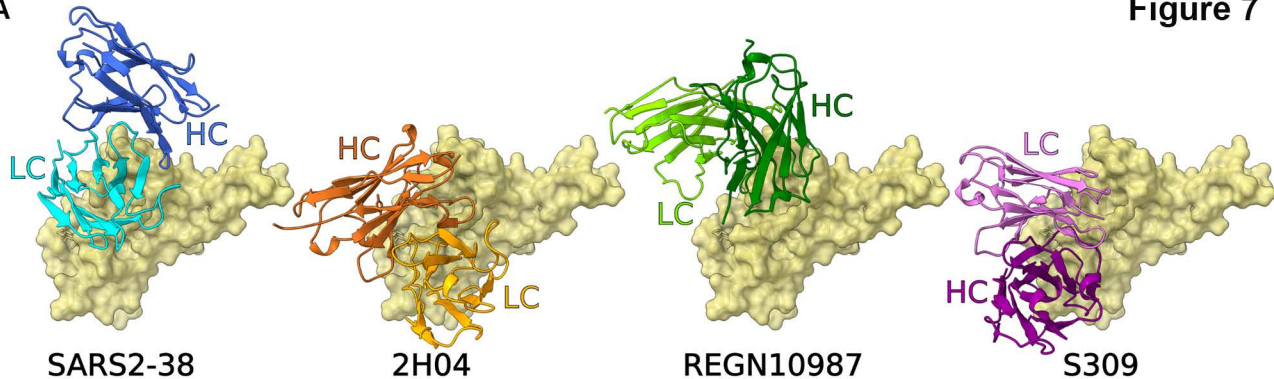

B

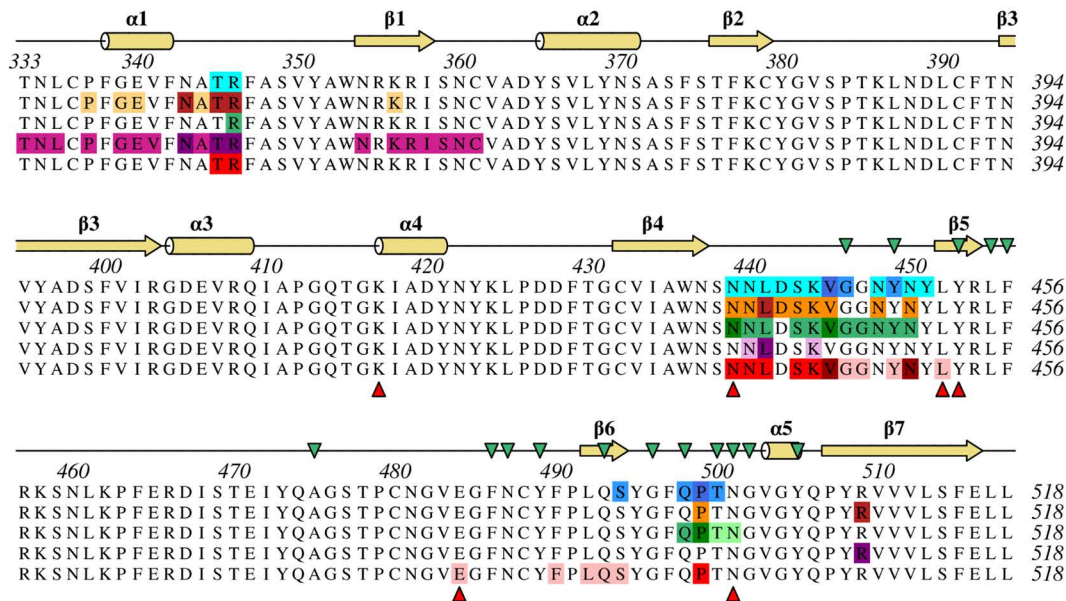

Source: https://www.biorxiv.org/content/10.1101/2021.04.26.441501v1.full.pdf
