# Supplementary material for: A potently neutralizing anti-SARS-CoV-2 antibody inhibits variants of concern by binding a highly conserved epitope
Source: bioRxiv or medRxiv preprint supplement (doi:10.1101/2021.04.26.441501), 2021-04-26
Supplement: Supplementary file [file media-1.pdf]

# First (unlabeled) mAb

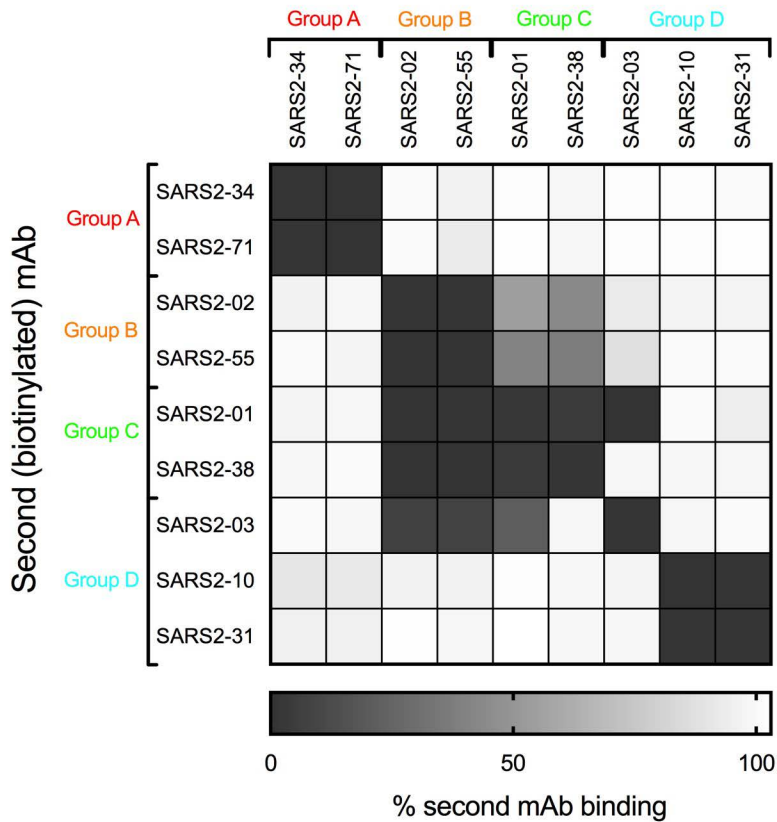

**Figure S1**

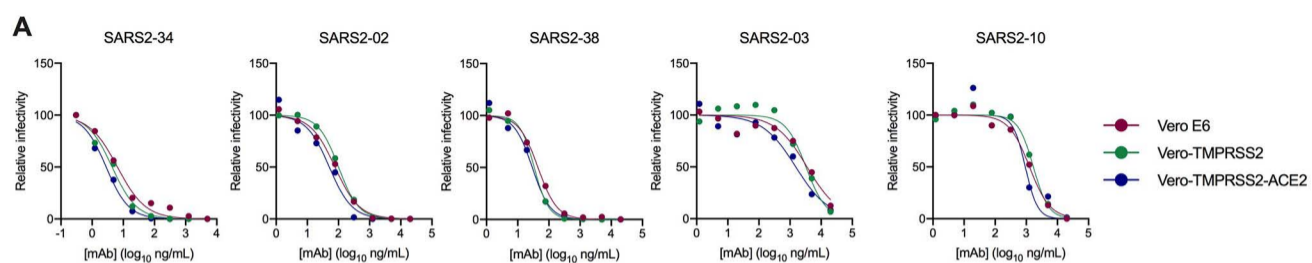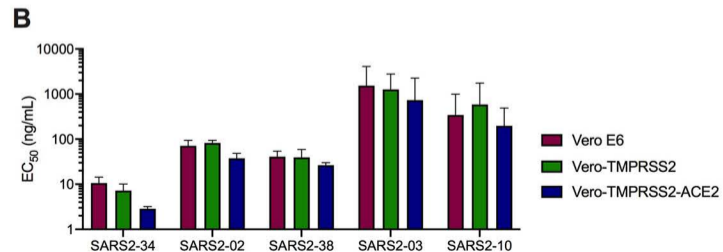

**Figure S2**

**A**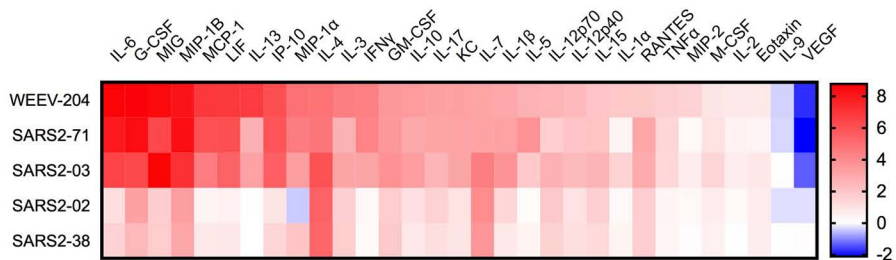**B**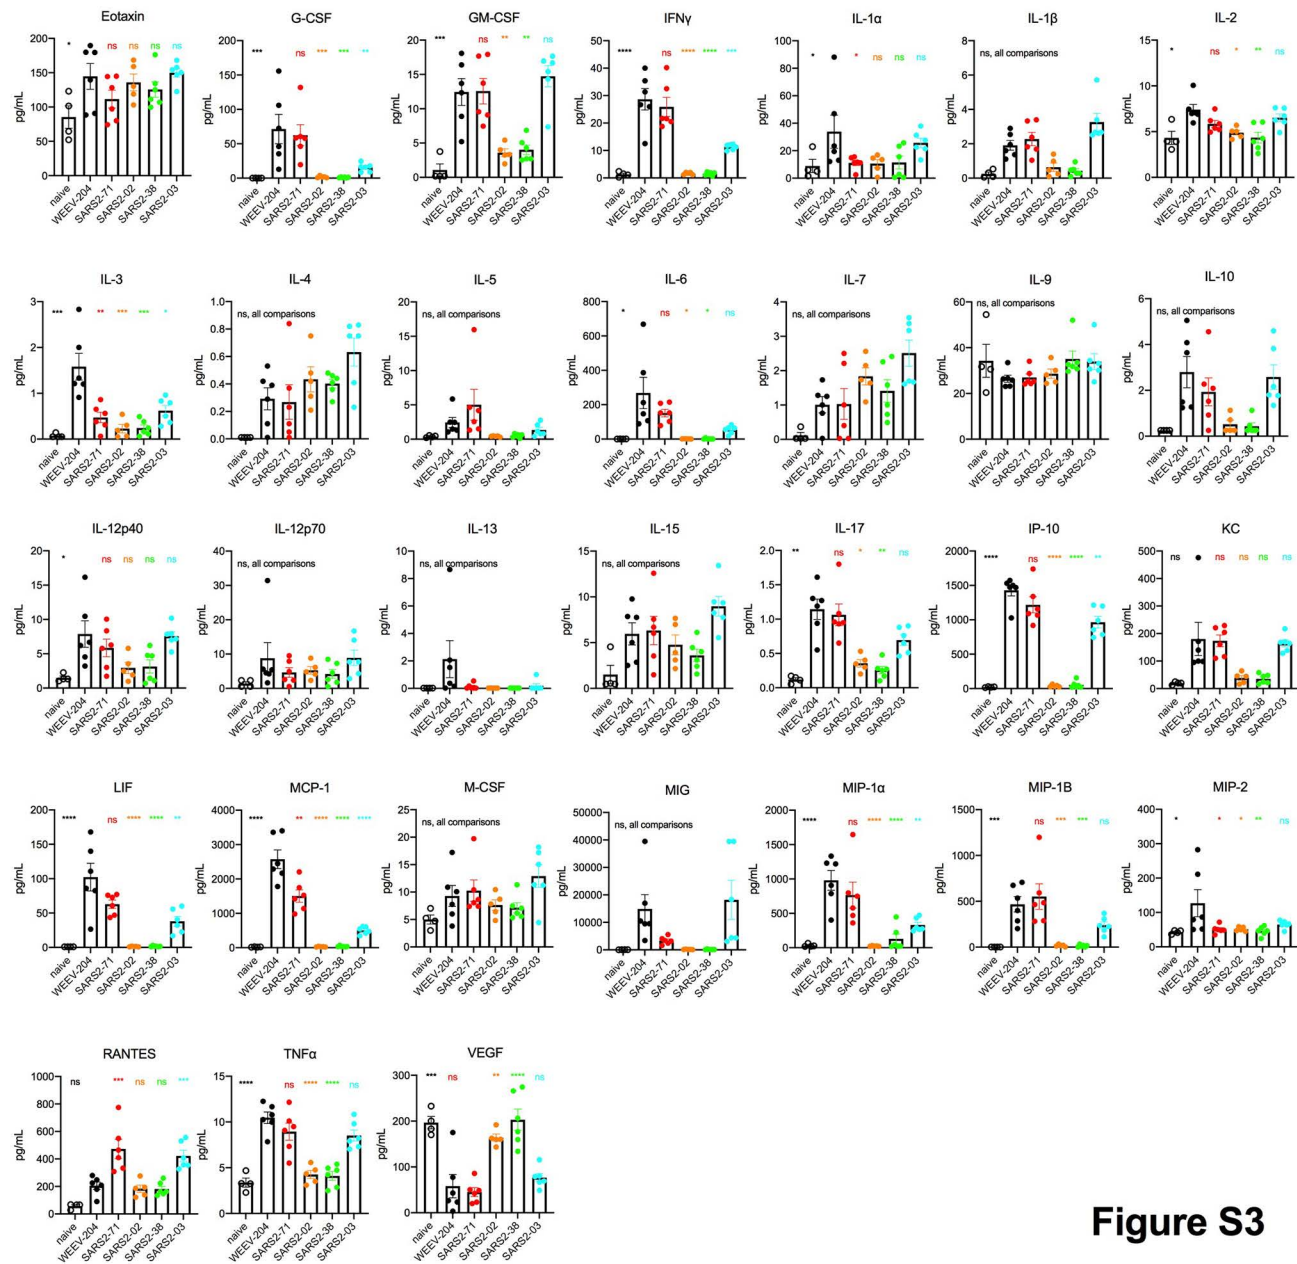**Figure S3**

### SARS2-02

humanized IgG1 vs murine IgG1

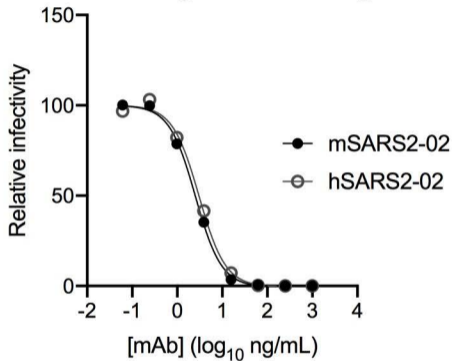

### SARS2-38

humanized IgG1 vs murine IgG1

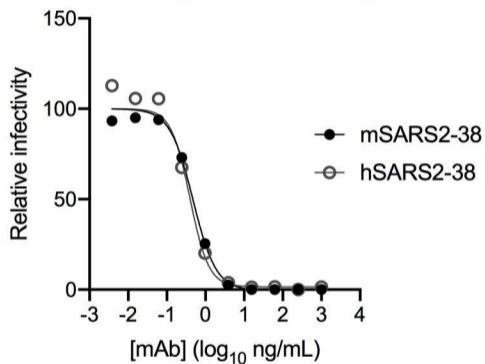

**Figure S4**

A

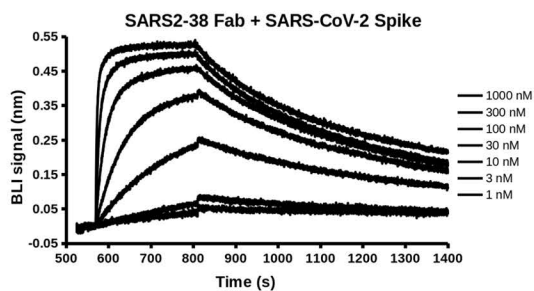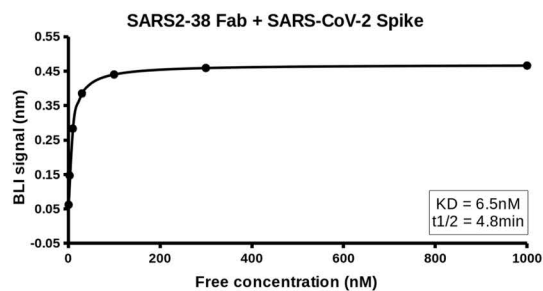

B

standard lacey carbon

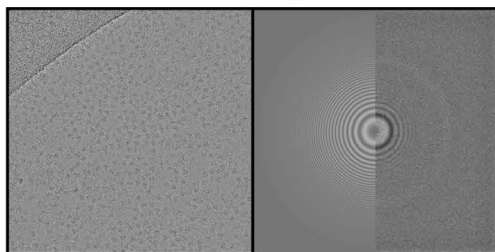

lacey carbon + ultra-thin film

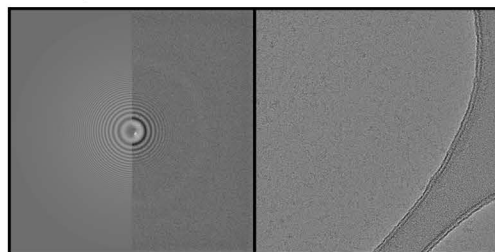

1,142,860 particles

2D classification

570,026 particles

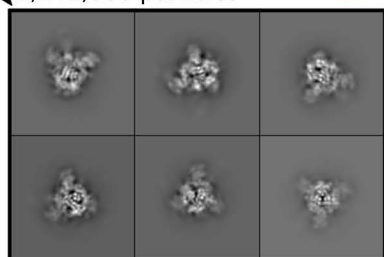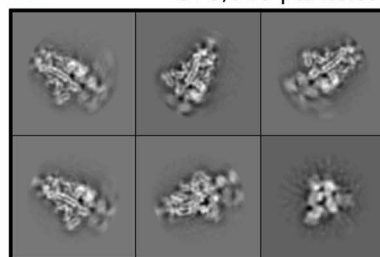

703,394 particles

3D classification

201,162 particles

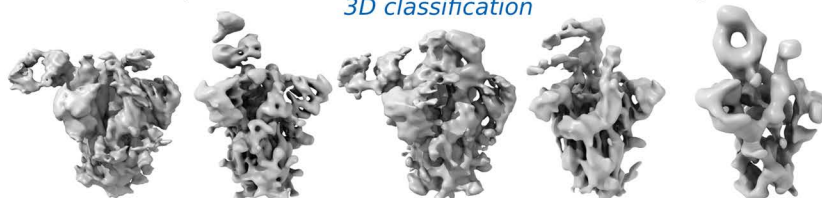281,097  
particles272,007  
particles199,334  
particles83,052  
particles69,066  
particles

U/D/D 1 Fab D/D/D 1 Fab U/D/D 3 Fab

CTF refinement  
Bayesian polishing  
non-uniform refinement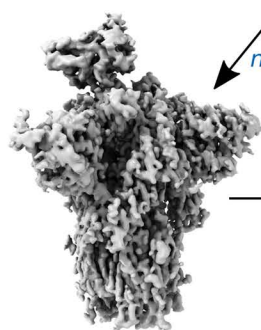local non-uniform  
refinement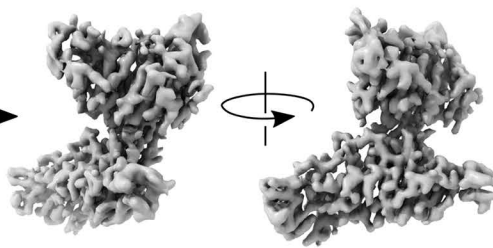

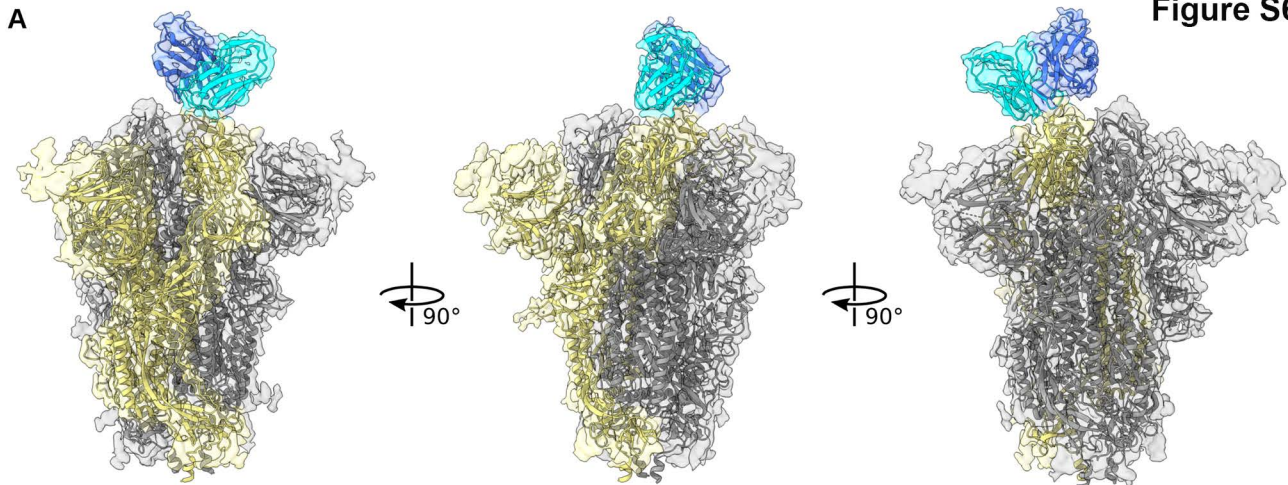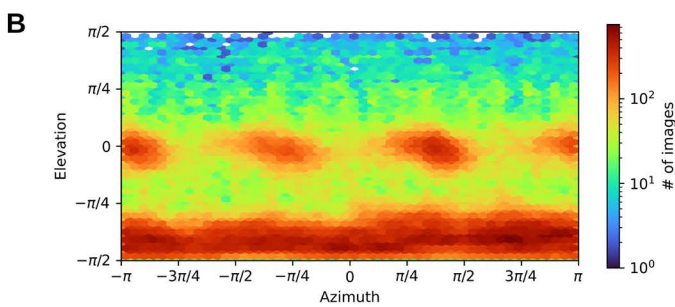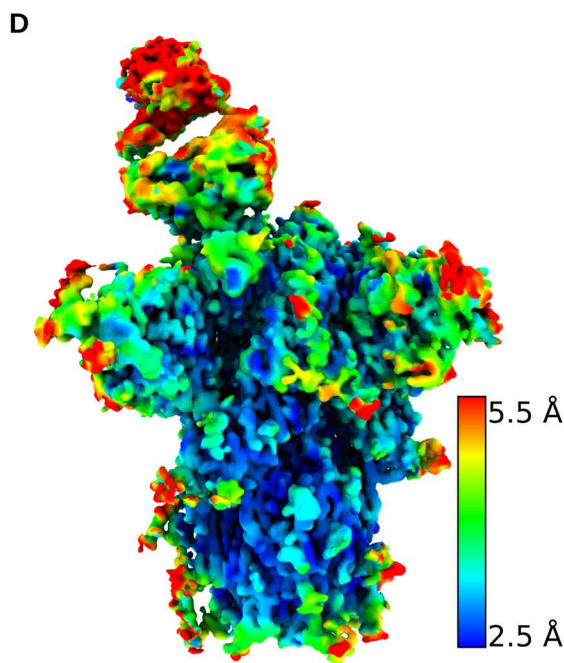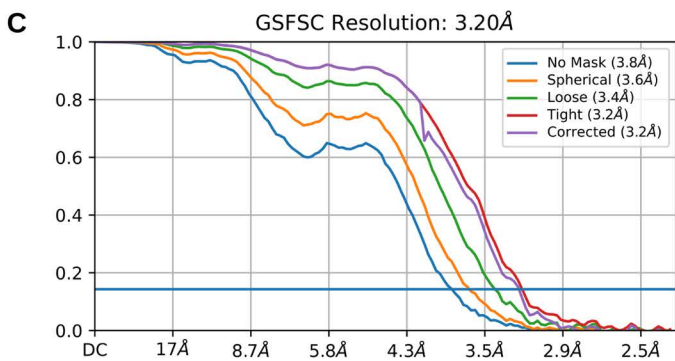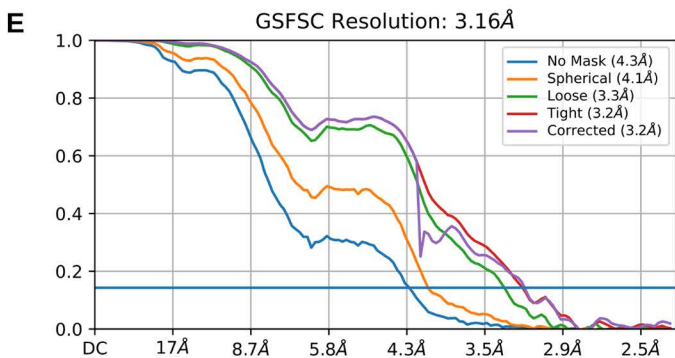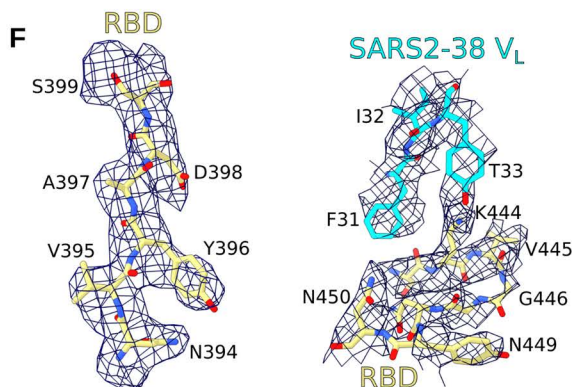

# Table S1

| <b>Cryo-EM data collection, processing, and model refinement statistics</b> |                                                                      |                                                                     |
|-----------------------------------------------------------------------------|----------------------------------------------------------------------|---------------------------------------------------------------------|
|                                                                             | SARS-CoV-2 spike +<br>Fab SARS2-38 (global)<br>PDB 7MKL<br>EMD-23898 | SARS-CoV-2 spike +<br>Fab SARS2-38 (local)<br>PDB 7MKM<br>EMD-23899 |
| <b>Data collection</b>                                                      |                                                                      |                                                                     |
| Magnification                                                               | 59,000x                                                              | 59,000x                                                             |
| Exposure (e-/Å <sup>2</sup> )                                               | 50                                                                   | 50                                                                  |
| Defocus range (µm)                                                          | 0.8-2.3                                                              | 0.8-2.3                                                             |
| Pixel size (Å/pixel)                                                        | 1.16                                                                 | 1.16                                                                |
| <b>Data processing</b>                                                      |                                                                      |                                                                     |
| Initial particles (no.)                                                     | 1,712,886                                                            | 1,712,886                                                           |
| Final particles (no.)                                                       | 272,007                                                              | 272,007                                                             |
| Nominal resolution (Å)                                                      | 3.20                                                                 | 3.16                                                                |
| FSC threshold                                                               | 0.143                                                                | 0.143                                                               |
| <b>Model refinement</b>                                                     |                                                                      |                                                                     |
| Adapted PDB models                                                          | 6M0J, 1KIQ, 5XJM, 6VXX                                               | 6M0J, 1KIQ, 5XJM                                                    |
| Model resolution (Å)                                                        | 4.1                                                                  | 4.2                                                                 |
| FSC threshold                                                               | 0.5                                                                  | 0.5                                                                 |
| Model composition                                                           |                                                                      |                                                                     |
| Non-hydrogen atoms                                                          | 25,597                                                               | 3,192                                                               |
| Residues                                                                    | 3,164                                                                | 406                                                                 |
| Ligands                                                                     | 63                                                                   | 1                                                                   |
| B-factors (Å <sup>2</sup> )                                                 |                                                                      |                                                                     |
| Residues                                                                    | 102.17                                                               | 76.19                                                               |
| Ligands (glycans)                                                           | 122.20                                                               | 81.01                                                               |
| Bonds (RMSD)                                                                |                                                                      |                                                                     |
| Length (Å)                                                                  | 0.004                                                                | 0.003                                                               |
| Angles (°)                                                                  | 0.816                                                                | 0.797                                                               |
| Validation                                                                  |                                                                      |                                                                     |
| Molprobit score                                                             | 1.69                                                                 | 1.51                                                                |
| Clash score                                                                 | 10.10                                                                | 8.33                                                                |
| Rotamer outliers (%)                                                        | 0.00                                                                 | 0.00                                                                |
| Ramachandran                                                                |                                                                      |                                                                     |
| Favored (%)                                                                 | 97.09                                                                | 97.75                                                               |
| Allowed (%)                                                                 | 2.91                                                                 | 2.25                                                                |
| Outliers (%)                                                                | 0.0                                                                  | 0.0                                                                 |
